1 **Limited overlap in RNA virome composition among rabbits and their**  
2 **ectoparasites reveals barriers to virus transmission**

3

4

5

6 Jackie E. Mahar<sup>1,2</sup>, Mang Shi<sup>1</sup>, Robyn N. Hall<sup>2,3</sup>, Tanja Strive<sup>2,3</sup>, Edward C. Holmes<sup>1</sup>

7

8

9

10 <sup>1</sup>Marie Bashir Institute for Infectious Disease and Biosecurity, Charles Perkins Centre,  
11 School of Life and Environmental Sciences and Sydney Medical School, The University of  
12 Sydney, Sydney, NSW 2006, Australia.

13 <sup>2</sup>Commonwealth Scientific and Industrial Research Organisation, Health and Biosecurity,  
14 Black Mountain, ACT 2601, Australia.

15 <sup>3</sup>Centre for Invasive Species Solutions, University of Canberra, Bruce, ACT 2601, Australia.

16

17 **Running title:** Comparison of rabbit and ectoparasite viromes

18

19 **Corresponding author:**

20 Edward C. Holmes,

21 Marie Bashir Institute for Infectious Disease and Biosecurity, Charles Perkins Centre,

22 School of Life and Environmental Sciences and Sydney Medical School,

23 The University of Sydney, Sydney, NSW 2006, Australia.

24 Email: edward.holmes@sydney.edu.au

## 25 **Abstract**

26 Ectoparasites play an important role in virus transmission among vertebrates. However, little  
27 is known about the extent and composition of viruses that pass between invertebrates and  
28 vertebrates. In Australia, flies and fleas support the mechanical transmission of viral  
29 biological controls against wild rabbits - rabbit haemorrhagic disease virus (RHDV) and  
30 myxoma virus. We compared virome structure and composition in rabbits and these  
31 associated ectoparasites, sequencing total RNA from multiple tissues and gut contents of  
32 wild rabbits, fleas collected from these rabbits, and flies trapped sympatrically. Meta-  
33 transcriptomic analyses identified 50 novel viruses from multiple RNA virus families. Rabbits  
34 and their ectoparasites were characterised by markedly different viromes: although viral  
35 contigs from six virus families/groups were found in both rabbits and ectoparasites, none  
36 were vertebrate-associated. A novel calicivirus and picornavirus detected in rabbit caecal  
37 content were vertebrate-specific: the newly detected calicivirus was distinct from known  
38 rabbit caliciviruses, while the novel picornavirus clustered with the *Sapeloviruses*. Several  
39 *Picobirnaviridae* were also identified, falling in diverse phylogenetic positions suggestive of  
40 an association with co-infecting bacteria. The remaining viruses found in rabbits, and all  
41 those from ectoparasites, were likely associated with invertebrates, plants and co-infecting  
42 endosymbionts. While no full genomes of vertebrate-associated viruses were detected in  
43 ectoparasites, suggestive of major barriers to biological transmission with active replication,  
44 small numbers of reads from rabbit astrovirus, RHDV and other lagoviruses were present in  
45 flies. This supports the role of flies in the mechanical transmission of RHDV and implies that  
46 they may assist the spread of astroviruses.

47

48 **Keywords:** virus, ectoparasites, transmission, calicivirus, meta-transcriptomics, evolution

## 49 **Introduction**

50 Ectoparasites act as vectors for many notable viral pathogens of vertebrates, including Zika  
51 virus, dengue virus, and tick-borne encephalitis virus (Boyer, Calvez, Chouin-Carneiro,  
52 Diallo, & Failloux, 2018; Lindquist & Vapalahti, 2008; Rodhain, 2015). Transmission can  
53 occur "biologically", with active virus replication in the ectoparasite, or "mechanically"  
54 without ectoparasite replication (Chihota, Rennie, Kitching, & Mellor, 2001; Kuno & Chang,  
55 2005; McColl et al., 2002; Rodhain, 2015). Both mechanisms enable viruses to spread  
56 across spatial or ecological barriers that might inhibit direct transmission (Rosenberg &  
57 Beard, 2011). Ectoparasites are predominantly arthropods, including such animals as lice  
58 and fleas, as well as intermittent ectoparasites such as mosquitos, ticks and blowflies  
59 (Hopla, Durden, & Keirans, 1994).

60

61 The European rabbit (*Oryctolagus cuniculus*) has been profoundly impacted by  
62 ectoparasite-mediated viral transmission. As rabbits are a pest species in Australia, two  
63 virus biological controls - rabbit haemorrhagic disease virus (RHDV; single-stranded RNA)  
64 and myxoma virus (MYXV; double-stranded DNA) - were deliberately introduced to control  
65 wild rabbit populations in the 1950s and 1990s, respectively (Cooke & Fenner, 2002).  
66 Blowflies (Calliphoridae) and bushflies (Muscidae) are associated with the transmission of  
67 RHDV, while two species of rabbit fleas (*Spilopsyllus cuniculi* and *Xenopsylla cunicularis*) aid  
68 MYXV transmission (and mosquitos are potentially involved in the subsidiary transmission of  
69 both viruses) (Asgari, Hardy, Sinclair, & Cooke, 1998; Cooke & Fenner, 2002; Hall, Huang,  
70 Roberts, & Strive, 2019; McColl et al., 2002; Merchant et al., 2003; Sobey & Conolly, 1971).  
71 As viral replication is not believed to occur in insect tissue, transmission is entirely  
72 mechanical. RHDV is ingested by flies during feeding on carcasses and viable virus  
73 excreted in fly spots (Asgari et al., 1998), while fleas transmit MYXV through contaminated

74 mouthparts (Fenner, Day, & Woodroffe, 1952). Although RHDV is transmissible directly by  
75 the faecal-oral route, flies facilitate transmission between isolated populations (Schwensow  
76 et al., 2014). Indeed, before it's official release, RHDV escaped quarantine from Wardang  
77 island, South Australia, purportedly due to fly-vectoring transmission (Asgari et al., 1998;  
78 McColl et al., 2002). MYXV can also be transmitted via direct contact, although biting insect  
79 vectors enhance transmission and as such, rabbit fleas were also deliberately introduced  
80 into Australia (Merchant et al., 2003; Sobey & Conolly, 1971).

81  
82 Despite the importance of the ectoparasite-vector system in virus transmission and  
83 evolution, little is known about the composition of virus communities in both host types.  
84 Metagenomic studies of arthropod vector species such as mosquitoes and ticks have  
85 revealed an unexpectedly rich virus diversity, most of which likely do not infect vertebrates  
86 (Harvey, Rose, Eden, Lo, et al., 2019; Shi et al., 2017). Hence, it is not known what  
87 proportion of the viruses present in invertebrates pass to vertebrates and vice versa,  
88 although such information is central to understanding the evolution of vector-borne  
89 transmission and determining whether some viruses have more liberal host preferences  
90 than others.

91  
92 The advent of bulk RNA sequencing ("meta-transcriptomics") has revolutionized our  
93 perception of viral diversity and host range (Shi et al., 2016; Shi, Zhang, & Holmes, 2018),  
94 revealing large numbers of seemingly benign viruses (Shi, Lin, et al., 2018). The invertebrate  
95 meta-transcriptomic studies undertaken to date include various species of ectoparasite,  
96 such as mosquitos, ticks and fleas, revealing abundant and complex viromes (Harvey, Rose,  
97 Eden, Lawrence, et al., 2019; Harvey, Rose, Eden, Lo, et al., 2019; Shi et al., 2017). Herein,  
98 by comparing the viromes of Australian wild rabbits alongside associated rabbit fleas and  
99 sympatric flies, we present the first joint study of virome composition in vertebrates and



100 their associated ectoparasites. Our aim was to determine whether and how virome  
101 composition differed between rabbits and the ectoparasites sampled on or near these  
102 rabbits, and whether some types of virus were common to both types of host such that they  
103 are involved in either biological or mechanical transmission.

104

## 105 **Materials and Methods**

### 106 *Tissue Sampling*

107 Sampling was performed at two sites within the Australian Capital Territory (ACT), Australia:  
108 site 1 was at CSIRO Crace (-35.22, 149.12), Gungahlin (GUN), a suburb of Canberra, while  
109 site 2 was at Gudgenby Valley (-35.74, 148.98) in Namadgi National Park (Gudg). At site 1,  
110 rabbits were trapped in carrot baited cages and killed by cervical dislocation. Trapping  
111 occurred over 3-5 consecutive nights for two separate weeks of the 2016/2017 southern  
112 hemisphere summer (18<sup>th</sup> – 22<sup>nd</sup> December 2016, 8<sup>th</sup> – 11<sup>th</sup> January 2017). A total of 20  
113 rabbits were sampled, with weights ranging between 0.27 kg and 1.95 kg (mean 0.82 kg). At  
114 site 2, rabbits were killed by shooting on 2<sup>nd</sup> February 2017. Eighteen rabbits were collected,  
115 weighing between 0.52 kg and 2.2 kg (mean 1.49 kg). Blood (in EDTA tubes), lung, liver,  
116 duodenum, and caecal content were collected from each rabbit. Where fleas were present  
117 on rabbits, they were collected and grouped by rabbit. Tissues and fleas were stored below  
118 -80°C immediately after collection.

119

120 Commercially available fly traps (Envirosafe™) were placed at the same locations in the  
121 same weeks as rabbit sampling. Traps were baited with rabbit tissue/gut content and/or  
122 chicken necks, and bait was physically separated from flies to prevent contamination. Fly  
123 traps were left out for periods of up to 24 hours. Only live flies were taken from traps to  
124 ensure fresh samples. Live flies were chilled at 4°C or -20°C for periods of 5-10 mins to

125 allow initial visual identification of fly species, before being frozen at -80°C. From site 1  
126 (GUN), 149 flies representing 5 species were collected, while 22 flies from 2 species were  
127 collected from site 2 (Gudg) (Table 1).

128

129 All work was carried out according to the Australian Code for the Care and Use of Animals  
130 for Scientific Purposes with approval from the institutional animal ethics committee (Permit  
131 CWLA-AEC#16-02).

132

### 133 ***RNA extraction***

134 RNA was extracted separately for each sample; from 20 mg of rabbit tissue or bone  
135 marrow, 75 µl of rabbit blood, individual whole flies or groups of at least 5 fleas from  
136 individual rabbits. RNA was extracted using the Maxwell 16 LEV simplyRNA tissue kit in  
137 combination with the Maxwell nucleic acid extraction robot (Promega, WI, USA), according  
138 to manufacturer's instruction, including DNase treatment.

139

### 140 ***Library construction and sequencing***

141 Rabbit RNA was pooled by tissue type and collection site, with up to 20 individuals per  
142 pool, while insect RNA was pooled by species and collection site, with pool sizes ranging  
143 from 2 – 10 individuals (Table 1). Where large numbers of flies of the same species were  
144 collected, RNA from a maximum of 10 flies were pooled together. Liver RNA required further  
145 DNase treatment after pooling, using Invitrogen TURBO DNase (Thermofisher Scientific). All  
146 pooled RNA was further purified using the RNeasy MinElute clean-up kit (Qiagen, Hilden,  
147 Germany) and quantified using the Qubit RNA Broad-range Assay with the Qubit  
148 Fluorometer v3.0 (Thermofisher Scientific). RNA pools were assessed for quality using the  
149 Agilent RNA 6000 Nano kit and Agilent 2100 Bioanalyzer (Agilent Technologies, CA, USA).

150 Library construction and sequencing was performed at the Australian Genomic Research  
151 Facility. Libraries were constructed using the TruSeq Total RNA Library Preparation protocol  
152 (Illumina, CA, USA) and rRNA was removed using the Illumina Ribo-Zero Gold rRNA removal  
153 kit (Epidemiology). Paired-end (100 bp) sequencing of each RNA library was performed on  
154 the HiSeq 2500 sequencing platform (Illumina, CA, USA).

155

### 156 ***Assembly and genome annotation***

157 *De novo* assembly of reads into contigs was performed using Trinity (Grabherr et al., 2011)  
158 following trimming with Trimmomatic (Bolger, Lohse, & Usadel, 2014). The RSEM tool (B. Li,  
159 Ruotti, Stewart, Thomson, & Dewey, 2010) in Trinity was used to calculate the relative  
160 abundance of each contig (expected counts). BLASTn and DIAMOND BLASTx were then  
161 used to compare Trinity contigs to the NCBI nucleotide (nt) database (e-value cut-off  $1 \times 10^{-10}$ )  
162 and non-redundant protein (nr) database (e-value cut-off  $1 \times 10^{-5}$ ), respectively. Results  
163 were filtered so that only contigs that had a viral hit (excluding endogenous  
164 viruses/retroviruses) from each BLAST search were retained.

165

166 Equivalent BLAST analyses were performed on individual reads to detect viruses at low  
167 abundance, with e-value cut-offs of  $1 \times 10^{-4}$  for BLASTx and  $1 \times 10^{-10}$  for BLASTn. A  
168 conservative approach was taken such that only reads that had a virus result in both the  
169 BLASTn and BLASTx analyses were considered as legitimate hits. Ectoparasite library read-  
170 mapping to specific virus reference sequences or rabbit viral contigs was conducted using  
171 Bowtie2 (Langmead & Salzberg, 2012).

172

173 To remove residual host rRNA sequences, all reads were mapped to host rRNA using  
174 Bowtie2 (Langmead & Salzberg, 2012). The rabbit host rRNA target index was generated

175 from a complete *O. cuniculus* 18S rRNA reference sequence obtained from GenBank  
176 (accession NR\_033238) and a near complete *O. cuniculus* 28S rRNA sequence obtained  
177 from the SILVA high quality ribosomal database (Quast et al., 2013) (accession  
178 GBCA01000314). The arthropod rRNA target index was generated from 18S and 28S  
179 GenBank sequences from *Spilopsyllus cuniculi* and multiple *Chrysomya*, *Calliphora*,  
180 *Sarcophaga*, and *Musca* species. The total number of reads that did not map to host rRNA  
181 for each library were used as the denominator to calculate the percentage of reads mapped  
182 to viral contigs.

183  
184 The Geneious assembler (Kearse et al., 2012) was used to extend viral contigs where  
185 possible. Open reading frames of viral contigs were identified using the online GeneMark  
186 heuristic approach to gene prediction tool (Besemer & Borodovsky, 1999), while conserved  
187 domains were identified using RSP-TBLASTN v2.6.0, a variant of PSI-BLAST (Altschul et al.,  
188 1997).

189

### 190 ***Phylogenetic analyses***

191 Reference RNA-dependent RNA polymerase (RdRp) amino acid sequences for each virus  
192 family were downloaded from NCBI and aligned with viral contigs using MAFFT v7.271  
193 (Kato & Standley, 2013). Where necessary, large data sets were condensed to a more  
194 manageable size using CD-HIT version 4.8.1 (W. Li & Godzik, 2006). Poorly and  
195 ambiguously aligned sites were removed using trimAl v1.2rev59 (Capella-Gutierrez, Silla-  
196 Martinez, & Gabaldon, 2009). Alignments were visualized in Geneious (Kearse et al., 2012).  
197 Maximum likelihood trees of each alignment were inferred using PhyML (Guindon et al.,  
198 2010) employing the LG amino acid replacement model selected by IQTree (Nguyen,  
199 Schmidt, von Haeseler, & Minh, 2015), using a combination of NNI (Nearest Neighbour

200 Interchange) and SPR (Subtree Pruning and Regrafting) branch-swapping. Branch supports  
201 were estimated with the Shimodaira-Hasegawa (SH)-like approximate likelihood ratio test  
202 (Guindon et al., 2010). The size and length of each alignment is provided in Table S1 and  
203 details of viral contigs included in phylogenies are provided in Table S2.

204

### 205 ***Screening PCRs for detection of rabbit calicivirus and picornavirus***

206 Primer sets were designed to amplify a small region of each of the novel rabbit calicivirus  
207 and picornavirus genomes for the detection of these viruses in individual caecal content  
208 samples. The calicivirus primer set GRC\_F5.6 (5'-TTA CTC AGA GCG ACC AAG TGC-3',  
209 positive sense) and GRC\_R5.9 (5'-CCA GTT CTC GCC TGT ATC CAG-3', negative sense)  
210 amplified a 278 bp region, while the picornavirus primer set GRP\_F6.5 (5'-GAT CTT ATC  
211 CCA CCC AAT CGT GA-3', positive sense) and GRP\_R6.9 (5'-ATA GCC TCT TCT CCA TAA  
212 CCA AGC-3', negative sense) amplified a 401 bp region. RT-PCRs were conducted using  
213 the QIAGEN® OneStep Ahead RT-PCR Kit according to the manufacturer's directions with  
214 1 µl of RNA (diluted 1:10 in nuclease-free water) in a 10 µl reaction volume with 0.25 µM of  
215 each primer. PCR conditions included 10 cycles of touchdown PCR, with the annealing  
216 temperature decreasing by 0.5 °C each cycle from a starting temp of 60 °C, and a further 30  
217 cycles with annealing temperature at 55 °C. Representative amplicons were Sanger  
218 sequenced to confirm their legitimacy.

219

### 220 ***Extension/confirmation of 3' end of novel calicivirus genome***

221 First strand cDNA synthesis was conducted using the Invitrogen Superscript IV reverse  
222 transcriptase system (ThermoFisher Scientific, MA, USA), with 5 µl of RNA and 0.5 µM of  
223 GV270 gene-specific primer (Eden, Tanaka, Boni, Rawlinson, & White, 2013) in a 20 µl  
224 reaction volume. PCR was conducted using the Invitrogen Platinum Taq Polymerase High

225 Fidelity kit according to the manufacturer's protocol with specifically designed forward  
226 primer GRC\_F6.2 (5'-CAG AGA ATG AGC TCA ACC GAC A-3'), and reverse primer GV271  
227 (Eden et al., 2013). Reaction volumes of 40 µl included 2.5 µl of cDNA template and 1 µM of  
228 each primer. PCR was conducted for 45 cycles, with the annealing temperature starting at  
229 65 °C and decreasing by 0.5 °C each cycle. The positive amplicon was approximately 500  
230 bp (includes polyA tail) and was Sanger sequenced for confirmation.

231

### 232 ***Detection of lagoviruses in flies and rabbit carcasses***

233 RNAs from individual flies and from the bone marrow of rabbit carcasses found near  
234 Gungahlin fly traps were screened for the presence of pathogenic lagoviruses using the  
235 multiplex RT-PCR described previously (Hall et al., 2018).

236

## 237 **Results**

### 238 ***Genetic identification of unknown arthropods***

239 The majority of arthropods analysed in this study were identified to the species level through  
240 visual inspection. The remainder were characterised using the RNA-Seq data. Fleas were  
241 confirmed to be *Spilopsyllus cuniculi* (rabbit fleas) based on the presence of several highly  
242 abundant contigs of *Spilopsyllus cuniculi* rRNA and EF1a genes and the absence of any  
243 other *Spilopsyllus* species genes. A library of unidentified *Chrysomya* species (GUNCHsp  
244 library) was determined to be *Chrysomya rufifacies* or *albiceps* (these two species are  
245 potentially the same) based on EF1a and rRNA genes. An unknown *Sarcophaga* species  
246 was most likely *Sarcophaga impatiens* based 28S rRNA identity.

247

### 248 ***Fly species trapped***

249 A wider diversity of flies were trapped at site 1, a suburb of Canberra (n = 5 species), than at  
250 site 2, in Namadgi National Park (n = 2 species, Table 1). Species from the genera  
251 *Calliphora*, *Chrysomya* (both Calliphoridae) and *Sarcophaga* (Sarcophagidae) were collected  
252 from site 1, while species from *Calliphora* and *Musca* (Muscidae) were isolated from site 2.  
253 *Calliphora augur* was the only species trapped at both sites (Table 1).

254

### 255 ***Virus contigs in ectoparasites***

256 A large number of RNA viral contigs were assembled from the flea and fly libraries. Of the  
257 invertebrate species, *Calliphora vicina* had the highest virus abundance (as a proportion of  
258 non-rRNA reads), with almost 2% of non-rRNA reads being viral, while *Chrysomya* species  
259 had viral abundances of only 0.013 – 0.019% (Figure 1). Each ectoparasite species had  
260 virus contigs from between 6 and 14 different RNA virus families. While viruses from several  
261 different families were detected in fleas (10 – 14 families), viruses in both flea libraries largely  
262 belonged to the *Iflaviridae* and Sobemo-like viruses (Figure 1). Of the fly species, the  
263 *Calliphora augur* libraries harboured the highest number of virus families, although diversity  
264 did not differ extensively between libraries. Although only fleas and *Calliphora augur* were  
265 sampled from both sites, the viral diversity of these two species at each site suggests that  
266 viral composition was associated with host species rather than collection location (Figure 1).  
267 The fly results also suggest that there is a trend in viral composition at the genus level  
268 (GUNCaA, GudgCaA and GUNCaV are genus *Calliphora*, while GUNChsp and GUNChV are  
269 *Chrysomya*), with decreasing similarity in viral composition at the family level and beyond  
270 (Figure 1). Members of the *Partitiviridae* and *Phenuiviridae* were detected in all invertebrate  
271 species, although it is possible that some of the low abundance viruses (as low as 46 and

272 78 reads, respectively) represent cross-contamination since all flies were caught in the  
273 same trap at each location.

274

275 To establish the diversity and potential host of newly defined viruses, family level (in some  
276 cases super-family level) phylogenetic trees were estimated using the virus RdRp (Figure 2).

277 While many of the highly diverse phylogenies had poorly resolved topologies, we identified  
278 at least 25 diverse viruses that likely constitute new species. The majority of viruses found in

279 invertebrate species clustered with invertebrate-associated viruses in the *Dicistroviridae*,

280 *Iflaviridae*, *Nodaviridae*, Flavi-like, *Solemoviridae*/Sobemo-like, Virga-like, *Orthomyxoviridae*,

281 *Mononegavirales*, *Reoviridae*, *Phasmaviridae* (*Bunyavirales*) and unclassified bunyavirales

282 groups. Additionally, many of the viruses found in insects, particularly fleas, were potentially

283 viruses of fungi, protozoa or algae, being present in the *Hypoviridae*, *Narnaviridae*,

284 *Partitiviridae*, the *Totiviridae-Chrysoviridae* group and certain *Phenuiviridae* (*Bunyavirales*).

285 The *Bromoviridae* virus identified in Gungahlin fleas clusters firmly among plant viruses, and

286 with an abundance of only 0.002% it likely represents a plant virus carried by fleas rather

287 than a virus of fleas themselves. Indeed, care must be taken in assigning viruses to hosts on

288 the basis of metagenomic data alone. The *Iflaviridae* flea viruses found in this study

289 clustered most closely with Watson virus, detected in fleas (*Pygiopsylla*) from Australian

290 marsupials (Figure 2).

291

### 292 ***Virus contigs in rabbits***

293 No viral contigs could be assembled from the rabbit liver, duodenum, or lung libraries. A

294 small number of viral contigs were found in the Gudgenby blood library, but these were

295 potential contaminants since (i) rabbits from Gudgenby were shot, occasionally resulting in

296 perforation of the caecum which would contaminate blood in the body cavity, (ii) all viruses



297 detected in the blood were also detected in the caecum (including plant viruses unlikely to  
298 be in blood), and (iii) no viruses were found in the blood of rabbits from the Gungahlin site  
299 where there was no body cavity contamination.

300

301 In contrast, the caecal content for rabbits from both sites contained many viruses, with 8  
302 and 11 RNA viral families detected in the Gudgenby and Gungahlin rabbits, respectively  
303 (Figure 1), including over 25 likely new viral species. The viral composition of rabbit caecal  
304 content was less consistent between the two sites than for the invertebrates. This may be a  
305 consequence of sampling only small sections of caecal content, but could also reflect  
306 differences in diet at each site (predominantly introduced pastures at site 1 versus more  
307 subalpine native grassland plants at site 2). Regardless, *Narnaviridae* and *Virgaviridae* were  
308 both highly abundant in the caecal content of rabbits from both locations, while  
309 *Tombusviridae* was also a major component of the caecal virome of Gudgenby rabbits  
310 (Figure 1). These three virus families, that make up more than 70% of the total viral  
311 abundance in rabbit caecal content at each site, likely represent viruses of the rabbit diet  
312 (plants) and commensal/parasitic organisms such as fungi and protists. Although the  
313 *Tombusviridae* were traditionally associated with plants, recent studies have found many  
314 tombus-like viruses in invertebrates (Shi et al., 2016) and these group with the caecal  
315 content viruses determined here. Hence, these tombus-like viruses may in fact infect  
316 commensal or parasitic microorganisms such as protists or fungi, or rabbits may be  
317 incidentally eating invertebrates.

318

319 Although less abundant, diverse novel viruses from two vertebrate viral families - the  
320 *Caliciviridae* and the *Picornaviridae* - and one potentially vertebrate-associated viral family,  
321 the *Picobirnaviridae*, were detected in rabbit caecal content at both sites: all three at  
322 Gungahlin, and the *Picobirnaviridae* at Gudgenby. Two related *Caliciviridae* contigs were

323 assembled, with 77.8% nucleotide identity in the genome and 90.8% identity at the RdRp  
324 protein level. They clustered most closely - although distantly - with a pig calicivirus and  
325 marmot norovirus (Figure 3), sharing 52 - 54% identity in the RdRp. Such a divergent  
326 phylogenetic position suggests that the new calicivirus contigs represents a new viral  
327 species (Figure 3), which we have termed *Racaecavirus*. After Sanger sequencing to extend  
328 the 3' end, one of the racaecavirus contigs encompassed a near complete genome, missing  
329 only the 5' UTR. *Racaecavirus* exhibited a classic calicivirus-like genome organization, with  
330 two open reading frames (ORF), one encoding a polyprotein including RdRp and capsid  
331 domains, and the second encoding a small protein of unknown function (Figure 3). Oddly,  
332 there appears to be only 1 nucleotide in the 3' UTR of this genome sequence, which was  
333 confirmed by Sanger sequencing.

334

335 Similarly, the entire coding region was obtained for a novel member of the *Picornaviridae*.  
336 This contained one large ORF, typical of the *Picornaviridae*, with multiple capsid proteins  
337 preceding non-structural proteins (Figure 3). The sequence also contained a 5' (478 nt) and  
338 3' (74 nt) UTR, although it is not clear if these are complete. The novel virus clusters, with  
339 strong support, with members of the *Enterovirus* and *Sapelovirus* genera (Figure 3). The  
340 closest sequenced relatives were feline picornavirus, bat picornavirus 3, Apodemus agrarius  
341 picornavirus, and marmot sapelovirus 2, that share an identity of 61 - 64% with the novel  
342 rabbit picornavirus in the RdRp protein (Figure 3). This level of divergence and phylogenetic  
343 position would define this virus as a new species within the genus *Sapelovirus* or a newly  
344 defined sapelovirus-like genus (Figure 3) (Zell, 2018). Accordingly, we propose the name  
345 *Orycavirus*.

346

347 Since RNA-sequencing was conducted on pools of 18-20 samples, specific RT-PCRs for  
348 the novel racaecavirus and orycavirus identified here were designed to determine their

349 frequency in individual animals. As these two viruses were only found in the Gungahlin  
350 caecal content library, only Gungahlin samples were screened. Racaecavirus was detected  
351 in 4/20 samples, while orycaivirus was detected in 10 of the 20 samples tested.

352

353 Finally, several picobirnaviruses were identified in rabbit caecal content, all of which  
354 clustered strongly in the supposedly vertebrate-specific genogroup 1 clade (Figure 4).  
355 Based on individual species sharing <75% amino acid similarity in the RdRp alignment,  
356 these data likely contain nine novel picobirnaviruses (although defined species demarcation  
357 criteria for this family are lacking). Consistent with naming conventions adopted for most  
358 picobirnavirus species, the tentative new viruses were named *Rabbit picobirnavirus* 1-9.  
359 Importantly, these viruses did not form a monophyletic group, but were distributed  
360 throughout genogroup 1. This pattern is typical of the *Picobirnaviridae* that show limited  
361 host structure in the RdRp phylogeny (Figure 4), and is compatible with the idea that these  
362 are in fact bacterial-associated viruses (Krishnamurthy & Wang, 2018). The RdRp segments  
363 (segment 2) were predicted to have one ORF, consistent with other members of this family.  
364 While pairing segments was difficult, several longer picobirnavirus segments with at least  
365 one large ORF, likely encoding the capsid, were identified in both caecal content libraries.  
366

### 367 ***Virus families present in both insect and rabbit libraries***

368 Viral contigs from the *Virgaviridae/Bromoviridae*/Virga-like (plant/invertebrate-associated),  
369 *Solemoviridae*/Sobemo-like (plant/invertebrate-associated), *Narnaviridae*  
370 (fungi/parasites/invertebrate-associated), *Partitiviridae* (plant/invertebrate/fungi/vertebrate  
371 faeces-associated), *Tombusviridae* (plant/invertebrate-associated) and *Toti-Chryso*  
372 (parasites/invertebrates/fungi-associated) groups were assembled from rabbit caecal  
373 content as well as from both fleas and flies (Figure 1 and Figure 5). As noted above, the

374 viruses assembled from rabbit caecal content in these virus families were unlikely to be  
375 actively replicating in rabbits. In addition, where viruses of the same family were assembled  
376 from arthropods as well as rabbits, they did not cluster together (Figure 2).

377

378 To further investigate the viral overlap between rabbits and ectoparasites, reads from  
379 ectoparasite libraries were mapped to the viral contigs from the rabbit caeca. A total of 58  
380 viral reads mapped to rabbit virus contigs, all associated with the viral groups described  
381 above, and hence were likely mapping to conserved regions. Taken together, these results  
382 show that no abundant viral species were shared between host and ectoparasites, such  
383 that there was no strong evidence of biological vector transmission.

384

#### 385 ***Low abundance vertebrate-associated viruses in ectoparasite libraries***

386 If the ectoparasites studied here were involved in mechanical transmission, viruses may not  
387 be sufficiently abundant to be assembled into contigs. To detect vertebrate viruses at low  
388 abundance we subjected individual reads from the flea and fly libraries to BLASTn and  
389 BLASTx analyses. Accordingly, small numbers of reads were detected for two known  
390 rabbit-specific viruses (Figure 6): Lagoviruses (RHDV and related viruses) of the *Caliciviridae*  
391 family and rabbit astroviruses. The lagovirus reads detected included RHDV, rabbit  
392 haemorrhagic disease virus 2 (RHDV2), and the benign rabbit calicivirus Australia-1 (RCV-  
393 A1). Because of recombination between RHDV, RHDV2, and RCV-A1 (Hall et al., 2018),  
394 classification of these viruses based on small numbers of reads is difficult. However, the  
395 presence of reads mapping to the non-structural gene segments of RHDV and the RCV-A1-  
396 like viruses, as well as the structural gene segments of RHDV2, suggests the presence of at  
397 least two RHDV-like viruses in these fly libraries - a recombinant RHDV/RHDV2 and  
398 recombinant RCV-A1-like/RHDV2. Equivalent read BLAST analyses were conducted on

399 rabbit libraries: two reads from RHDV2 recombinants were found in each of the Gudgenby  
400 liver, Gudgenby lung and Gungahlin blood libraries. Since they were at very low abundance,  
401 these viruses were not likely to be actively replicating in these rabbits, although they may  
402 represent the early hours of infection or a cleared infection. No vertebrate-specific virus  
403 reads were detected in the flea libraries or Gudgenby fly libraries. Due to the difficulty in  
404 confirming the legitimacy of viral reads, only those that had a virus result for both BLASTx  
405 and BLASTn analyses were included. Hence, this method will have necessarily led to a  
406 conservative estimate and the omission of diverse virus reads since these are unlikely to be  
407 detected in a BLASTn analysis.

408

409 Since some viruses were represented by as little as a single read per library, we confirmed  
410 the presence of RHDV-like viruses in invertebrates by RT-PCR. Importantly, several  
411 individual flies from all three libraries with RHDV-like reads were positive by RT-PCR despite  
412 each library having only 2 – 10 reads. In addition, bone marrow from rabbit carcasses  
413 collected during the same time and location as fly trapping at the Gungahlin site were also  
414 positive for RHDV2 recombinants by RT-PCR. This, and the presence of lagoviruses in  
415 rabbits and flies in the wider region at that time (Hall et al., 2019), suggests that pathogenic  
416 lagoviruses were circulating at the time of sampling and the small number of reads in fly  
417 libraries were *bona fide*. In contrast, no legitimate mapping occurred when ectoparasite  
418 reads were mapped to a MYXV reference genome (NC\_001132.2). This is consistent with  
419 the absence of visible clinical signs of myxomatosis in the sampled rabbits. In addition, no  
420 viruses with known pathogenic potential in humans were detected in fleas or flies.

421

## 422 **Discussion**

423 A rapidly changing climate increases the potential for ectoparasite-mediated pathogen  
424 transmission (Ogden, 2017). A key question is what proportion of the viruses detected in  
425 ectoparasites are potentially transmissible to their vertebrate hosts and vice versa, through  
426 either the biological or mechanical transmission routes. Similarly, it is important to  
427 determine whether some viruses have a greater propensity for mechanical transmission, or  
428 a greater capacity to productively infect both vertebrates and invertebrates. The answers to  
429 these questions will help reveal the barriers that prevent viruses from evolving vector-borne  
430 transmission.

431  
432 To better understand these key components of vector transmission, we compared the  
433 viromes of apparently healthy Australian wild rabbits with those of associated fleas and  
434 sympatric flies known to be involved in the transmission of rabbit viruses (Asgari et al.,  
435 1998; Sobey & Conolly, 1971). No viruses were found in the lung, liver, duodenum or blood,  
436 suggesting the absence of an acute or chronic systemic infection in the wild rabbits  
437 sampled for this study. In contrast, considerable viral diversity was detected in the caecal  
438 content. This likely reflects the role this organ plays in the digestion of plant matter, such  
439 that it is rich in bacteria, other microorganisms, and semi-digested plant material (Forsythe  
440 & Parker, 1985; Velasco-Galilea et al., 2018). Based on phylogenetic position, most viruses  
441 identified in the caecal content are likely to be associated with the rabbit diet or other  
442 commensal microorganisms, such as fungi and protozoa (Figure 2). To our knowledge,  
443 equivalent viral meta-transcriptomics analyses on caecal content have not been reported,  
444 although an abundance of plant and microorganism-associated viruses is consistent with  
445 the faecal viromes of other herbivores (Guan et al., 2018; Woo et al., 2014; Zhang et al.,  
446 2017). Importantly, we identified diverse novel viruses in rabbits – *Racaecavirus* and

447 *Orycavirus* - that cluster with other vertebrate-associated viruses (in the *Caliciviridae* and the  
448 *Picornaviridae*, respectively) suggesting that the most likely hosts are the rabbits from which  
449 they were sampled. In addition, several novel picobirnaviruses were detected, although their  
450 true host is uncertain. Overall, the abundance of the potential vertebrate viruses detected in  
451 rabbits was relatively low: calicivirus 0.003%, picornavirus 0.025%, picobirnavirus 0.002-  
452 0.011%, although benign rabbit viruses have been previously shown to be present at low  
453 titre (Capucci, Fusi, Lavazza, Pacciarini, & Rossi, 1996; Strive, Wright, & Robinson, 2009).  
454 Furthermore, as these viruses were isolated from caecal content, we would not expect to  
455 have sampled a high proportion of rabbit cells and by extension, viruses replicating in these  
456 cells.

457

458 Members of the *Caliciviridae* and *Picornaviridae* are frequently detected in vertebrates (Shi,  
459 Lin, et al., 2018; Zell, 2018), with many cases of confirmed host association (Feinstone,  
460 Kapikian, & Purceli, 1973; Ohlinger & Thiel, 1991; Thornhill, Kalica, Wyatt, Kapikian, &  
461 Chanock, 1975; Wells & Coyne, 2019). The *Caliciviridae* can be associated with serious  
462 illnesses, such as gastroenteritis in humans (Dolin, 1978) and haemorrhagic disease in  
463 rabbits (Ohlinger, Haas, Meyers, Weiland, & Thiel, 1990), while the *Picornaviridae* are a  
464 diverse group of viruses associated with various diseases in humans and animals (Zell,  
465 2018). Although there are two existing genera that include rabbit caliciviruses, rabbit  
466 *Vesivirus* and *Lagovirus*, the novel rabbit calicivirus identified here, *Racaecavirus*, clustered  
467 most closely with a pig calicivirus (*St-Valerian swine virus*) and *Marmot norovirus* (Figure 3),  
468 both sampled from the gut of healthy animals (L'Homme et al., 2009; Luo et al., 2018). *St-*  
469 *Valerian swine virus* is the only species within the newly classified genus *Valovirus* and the  
470 virus identified here (together with *Marmot norovirus*) likely belongs to this genus (L'Homme  
471 et al., 2009). The novel rabbit picornavirus we identified in caecal content, *Orycavirus*, was  
472 phylogenetically distinct to other rabbit picornaviruses, clustering with enteroviruses and

473 sapeloviruses/sapelo-like viruses (Figure 3). The genus *Enterovirus* includes important  
474 human respiratory pathogens, as well as more serious symptoms such as acute flaccid  
475 myelitis, meningitis, myocarditis and encephalitis (Wells & Coyne, 2019). Enteroviruses  
476 primarily target the gastrointestinal tract and most infections are thought to be  
477 asymptomatic (Wells & Coyne, 2019). The genus *Sapelovirus* was initially classified with  
478 members from swine, primate and avian hosts, and an unclear link to pathogenicity (Tseng  
479 & Tsai, 2007), although the creation of several new genera may now be appropriate (Zell,  
480 2018). The closest relatives of orycaivirus were isolated from faeces of apparently healthy  
481 cats, bats, and marmots, as well as rodents with unknown disease status (Lau et al., 2011;  
482 Lau et al., 2012; Luo et al., 2018). It is notable that the calicivirus and picornavirus detected  
483 here cluster with other viruses isolated from the gut content of seemingly healthy vertebrate  
484 hosts, tentatively suggestive of a cellular tropism specific to the lower intestinal tract.  
485 Additionally, since the sampled rabbits were apparently healthy, the novel calici- and  
486 picorna- viruses are likely non-pathogenic. Whether these viruses were present in the  
487 founder population of rabbits first introduced into Australia or whether they were exotic  
488 incursions awaits additional sampling from diverse locations.

489  
490 Nine novel species of *Picobirnaviridae* were identified in the rabbit caecum. *Picobirnaviridae*  
491 have been detected in several vertebrate species, including rabbits (Ganesh, Masachessi, &  
492 Mladenova, 2014; Ludert, Abdul-Latiff, Liprandi, & Liprandi, 1995; Woo et al., 2016), as well  
493 as invertebrates (Shi et al., 2016) and diatom colonies (Urayama, Takaki, & Nunoura, 2016).  
494 The picobirnaviruses documented here all cluster with the highly diverse and seemingly  
495 vertebrate-associated Genogroup 1. The new viruses do not form a monophyletic group by  
496 host species (Figure 4), consistent with other members of this family, and diverse  
497 picobirnaviruses are commonly found in a single species (Knox, Gedye, & Hayman, 2018;  
498 Woo et al., 2016). Consistent with our detection of *Picobirnaviridae* in caecal content,



499 viruses of this family have commonly been isolated from stool samples or cloacal swabs of  
500 vertebrates, either with no apparent symptoms or associated with diarrhea (Cummings et  
501 al., 2019; Smits et al., 2011; Smits et al., 2012; Woo et al., 2019). Although it has been  
502 suggested that these viruses are opportunistic pathogens (Ganesh et al., 2014), the  
503 absence of host phylogenetic structure and lack of conclusive detection in solid tissues  
504 suggests that vertebrates and invertebrates may not be the true hosts of this virus family.  
505 Indeed, based on the presence of conserved prokaryotic ribosomal binding sites, it was  
506 recently proposed that prokaryotes are the true hosts of *Picobirnaviridae* (Krishnamurthy &  
507 Wang, 2018), which would accord with the lack of taxonomic structure in vertebrate hosts.  
508  
509 A large number of diverse viruses were discovered in fleas collected from rabbits and  
510 Calliphoridae, Sarcophagidae and Muscidae flies trapped sympatrically (Figure 1 and Figure  
511 5). Viral composition in ectoparasites varied according to host species (Figure 1) rather than  
512 location, consistent with that seen in Australian mosquitos (Shi et al., 2017). The majority of  
513 highly abundant viruses were invertebrate viruses, with the remainder likely representing  
514 viruses of fungi, protozoa or other commensal microbes (Figure 2). Several viral  
515 families/groups identified in rabbit flea libraries were also found in fleas collected from  
516 Australian marsupials or rats, including the *Solemoviridae*, *Iflaviridae*, *Narnaviridae*,  
517 *Phenuiviridae* and *Totiviridae* (Harvey, Rose, Eden, Lawrence, et al., 2019). Generally,  
518 viruses from rabbit fleas did not cluster with viruses from other flea species (Figure 2), with  
519 the exception of the *Iflaviridae* flea viruses most closely related to Watson virus, a virus of  
520 *Pygiopsylla* fleas collected from an Australian marsupial (Harvey, Rose, Eden, Lawrence, et  
521 al., 2019). Viruses from six different viral groups/families were identified in both  
522 ectoparasites and rabbits (Figure 5), although the ectoparasite viruses were phylogenetically  
523 distinct from those found in rabbit caeca (Figure 2). This, and that none of the overlapping  
524 viral families were vertebrate-associated, suggests that there may be important barriers to

525 cross-species transmission. Indeed, no highly abundant vertebrate viruses were found in  
526 flies or fleas, suggesting that the species investigated here are not likely to be biological  
527 vectors for any vertebrate viruses, and that potential arboviruses are rare.  
528  
529 Carrion/bush flies and fleas have been implicated in the mechanical transmission of RHDV  
530 and MYXV in rabbits (Asgari et al., 1998; Hall et al., 2019; McColl et al., 2002; Sobey &  
531 Conolly, 1971). In these cases, no viral replication takes place within the ectoparasite, such  
532 that viral abundance would be very low and viral contigs may not be assembled.  
533 Accordingly, to detect viruses potentially associated with mechanical transmission, we also  
534 explored the low abundant viral reads from the invertebrate libraries (i.e. reads which were  
535 not assembled into contigs). This revealed evidence of RHDV and related lagoviruses  
536 (*Caliciviridae*) in three Calliphoridae fly species (Figure 6) - a family of flies associated with  
537 RHDV transmission (Asgari et al., 1998; Hall et al., 2019; McColl et al., 2002). Since the  
538 introduction of RHDV into Australia in 1995, several related viruses have been detected,  
539 including recombinants of the original RHDV and RHDV2, or RCV-A1 benign viruses and  
540 RHDV2 (Hall et al., 2015; Hall et al., 2018; Mahar, Read, et al., 2018). At least two RHDV2  
541 variants were detected in fly reads (RHDV/RHDV2 and RCV-A1-like/RHDV2), both known to  
542 be circulating at that time (Hall et al., 2019; Hall et al., 2018; Mahar, Hall, et al., 2018), and  
543 were confirmed by RT-PCR. A small number of RHDV2 reads were also identified in rabbit  
544 libraries, and incidentally, RHDV2 was detected by RT-PCR in dead rabbits found  
545 synchronously at the study site. Since RHDV infection is generally acute and susceptible  
546 rabbits die rapidly (Cooke & Fenner, 2002), RHDV-like reads were likely detected from  
547 recovering animals, in which RHDV RNA is detectable for at least 15 weeks post-infection  
548 (Gall, Hoffmann, Teifke, Lange, & Schirrneier, 2007). These results demonstrate that  
549 mechanically transmitted viruses can be detected concurrently in the vertebrate host and  
550 ectoparasite using a meta-transcriptomics approach, even in the case of highly virulent

551 viruses not known to cause persistent infections. Interestingly, rabbit astrovirus was also  
552 detected in *Sarcophaga impatiens* and *Chrysomya varipes*, although no reads were  
553 detected in rabbit material. This virus has been associated with enteric disease in rabbits,  
554 but may be detected in the gut in the absence of symptoms (Martella et al., 2011). The  
555 detection of rabbit astrovirus in flies is of interest as it suggests that astrovirus may be  
556 present in Australian wild rabbit populations and must be shed at high titres if it was  
557 acquired from faeces. However, as we did not detect any reads in healthy rabbits, more  
558 work is clearly needed to establish whether rabbit astroviruses can be transmitted by  
559 arthropods.

560

561 No viruses known to infect humans, or indeed any other vertebrates besides leporids, were  
562 detected in the sampled flies. These fly species are attracted to carrion and faeces, a factor  
563 that would promote the mechanical transmission of excreted viruses or those present in  
564 carcasses (Norris, 1965). Due to their excessive numbers, rabbit carcasses and faeces are  
565 not uncommon in rabbit-infested areas (like the sampling locations), whereas human  
566 remains and faeces are hopefully rarer and less accessible. However, we may have  
567 expected to find more viruses of livestock (site 1) and native vertebrate species (site 1 and  
568 2), which are abundant in the sampling locations. Hence, vertebrate-associated viral  
569 mechanical transmission by fly species may be uncommon, and factors such as high  
570 prevalence and high virus load in carcasses or faeces - as seen for RHDV-like viruses - may  
571 therefore be necessary for mechanical transmission (Mahar, Hall, et al., 2018; Neimanis,  
572 Larsson Pettersson, Huang, Gavier-Widen, & Strive, 2018). In contrast to flies, no vertebrate  
573 virus reads - including MYXV - were detected in fleas, although their behaviour of feeding on  
574 vertebrate blood rather than carcasses and faeces may limit opportunities for mechanical  
575 transmission to periods of acute systemic or viraemic infections. As such, ectoparasite

576 behaviour and host preference, alongside viral pathogenesis and prevalence, are likely  
577 important for mechanical transmission.

578

579 In sum, while rabbits and ectoparasites carry viruses from some of the same viral families,  
580 viruses from ectoparasites are phylogenetically distinct from viruses found in rabbit caecal  
581 content, suggesting that major host barriers exist that prevent invertebrate viruses from  
582 establishing productive replication cycles in vertebrates. Importantly, however, flies carried  
583 a very low abundance of vertebrate viruses with pathogenic capacity in rabbits, including  
584 RHDV for which fly-mediated mechanical transmission has already been demonstrated.  
585 Hence, although biological transmission appears difficult to evolve, flies may serve as  
586 important mechanical vectors for rabbit-associated viruses.

587

## 588 **Acknowledgements**

589 We thank Tegan King and Oliver Orgill and team from the ACT Parks and Conservation  
590 Services for sample acquisition, and Nina Huang for detection of lagoviruses in rabbit bone  
591 marrow. ECH is supported by an ARC Australian Laureate Fellowship (FL170100022). The  
592 authors acknowledge the Sydney Informatics Hub and the University of Sydney's high-  
593 performance computing cluster Artemis for providing the high-performance computing  
594 resources that have contributed to the research results reported within this paper.

595

## 596 **Data accessibility**

597 - Raw data: NCBI SRA BioProject XXXX.

598 - Viral contigs presented in phylogenies: GenBank accession numbers XXXXX-XXXX.

599

600 **Author contributions**

601 JE Mahar was involved in sample collection and research design, performed research,  
602 analysed data, and wrote the paper. M Shi contributed analytical pipelines and was involved  
603 in research design and manuscript editing. RN Hall was involved in sample collection, fly  
604 identification, research design and manuscript editing. T Strive was involved in research  
605 design, sample collection and manuscript editing. EC Holmes designed and obtained  
606 funding for research, assisted with data analysis and manuscript writing.

607 **Table 1. Rabbit and insect sampling and pooling details**

| Library               | Site <sup>†</sup> | Species                                           | Sample Type                    | No. samples in RNA-Seq pool |
|-----------------------|-------------------|---------------------------------------------------|--------------------------------|-----------------------------|
| <b>Rabbit tissues</b> |                   |                                                   |                                |                             |
| GUN-BI                | 1                 | <i>Oryctolagus cuniculus</i>                      | Blood                          | 20                          |
| GUN-Li                | 1                 | <i>Oryctolagus cuniculus</i>                      | Liver                          | 20                          |
| GUN-Lu                | 1                 | <i>Oryctolagus cuniculus</i>                      | Lung                           | 20                          |
| GUN-Duo               | 1                 | <i>Oryctolagus cuniculus</i>                      | Duo                            | 20                          |
| GUN-CC                | 1                 | <i>Oryctolagus cuniculus</i>                      | Caecal content                 | 20                          |
| Gudg-BI               | 2                 | <i>Oryctolagus cuniculus</i>                      | Blood                          | 18                          |
| Gudg-Li               | 2                 | <i>Oryctolagus cuniculus</i>                      | Liver                          | 18                          |
| Gudg-Lu               | 2                 | <i>Oryctolagus cuniculus</i>                      | Lung                           | 18                          |
| Gudg-Duo              | 2                 | <i>Oryctolagus cuniculus</i>                      | Duo                            | 18                          |
| Gudg-CC               | 2                 | <i>Oryctolagus cuniculus</i>                      | Caecal content                 | 18                          |
| <b>Arthropods</b>     |                   |                                                   |                                |                             |
| GUN-F                 | 1                 | <i>Spilopsyllus cuniculi</i> <sup>‡</sup>         | Entire fleas grouped by rabbit | >70 fleas from 8 rabbits    |
| GUN-ChV               | 1                 | <i>Chrysomya varipes</i>                          | Entire fly                     | 10                          |
| GUN-Chsp              | 1                 | <i>Chrysomya rufifacies/albiceps</i> <sup>‡</sup> | Entire fly                     | 10                          |
| GUN-CaV               | 1                 | <i>Calliphora vicina</i>                          | Entire fly                     | 10                          |
| GUN-CaA               | 1                 | <i>Calliphora augur</i>                           | Entire fly                     | 10                          |
| GUN-Sasp              | 1                 | <i>Sarcophaga impatiens</i> <sup>‡</sup>          | Entire fly                     | 2                           |
| Gudg-F                | 2                 | <i>Spilopsyllus cuniculi</i> <sup>‡</sup>         | Entire fleas grouped by rabbit | >50 fleas from 7 rabbits    |
| Gudg-CaA              | 2                 | <i>Calliphora augur</i>                           | Entire fly                     | 10                          |
| Gudg-Un               | 2                 | <i>Musca vetustissima</i>                         | Entire fly                     | 2                           |

608 <sup>†</sup>Site 1 - CSIRO Crace, Gungahlin; Site 2 - Gudgenby Valley in Namadgi National Park.

609 <sup>‡</sup>Species designation based on RNA-Seq data.

610 **Figure legends**

611 **Figure 1. RNA virus abundance and composition in rabbit and invertebrate libraries.**

612 The top plot displays the abundance of viral reads (y-axis) in each library (x-axis) as a  
613 proportion of total non-rRNA reads. The bottom plot shows the viral composition of each  
614 library by virus family/group (shaded/grouped by superfamily). Potential vertebrate viruses  
615 are indicated by asterisks within the shading. Only RNA viruses (with RdRp) are shown and  
616 only virus families that had an abundance of at least 0.001% in at least one library are  
617 presented. UC denotes unclassified viruses. Virus libraries are labelled as follows (collection  
618 site - species): GUN\_CC, Gungahlin - rabbit caecal content; Gudg\_CC, Gudgenby - rabbit  
619 caecal content; GUNF, Gungahlin - flea; GudgF, Gudgenby - flea; GUNCaA, Gungahlin -  
620 *Calliphora augur*; GudgCaA, Gudgenby - *Calliphora augur*; GUNCHsp, Gungahlin -  
621 *Chrysomya rufifacies/albiceps*; GUNCaV, Gungahlin - *Calliphora vicina*; GUNCHV, Gungahlin  
622 - *Chrysomya varipes*; GUNSasp, Gungahlin - *Sarcophaga impatiens*; GudgUn, Gudgenby -  
623 *Musca vetustissima*. Note that only the caecal content libraries from rabbits are included in  
624 the plots since no viruses were found in the other libraries. A cladogram connecting the  
625 libraries beneath the x-axis indicates the relationships between the sampled hosts in each  
626 library, where tips represent host species and nodes from top-to-bottom represent the  
627 levels of genus, family, super-family, order, class and kingdom.

628

629 **Figure 2. ML trees of the RdRp of likely non-vertebrate viruses.** The taxa name (and  
630 branches in minimized trees) for sequences obtained in this study are bolded and coloured  
631 red (rabbit caecal content), blue (flies), or purple (fleas), based on the animal from which  
632 they were obtained, with relevant animal symbols adjacent to the names. Viruses that likely  
633 constitute a new viral species are indicated by a pink star symbol adjacent to taxa names,  
634 and a proposed virus species name is given as the taxa name (with strain name in  
635 parentheses). For GenBank sequences, taxa names are coloured by the apparent host

636 group from which virus or viral sequence was reportedly isolated: black, invertebrate; teal,  
637 fungi/mould/yeast; maroon, vertebrates; orange, Trypanosomatidae; pink, Stramenopiles  
638 (microalgae(diatom)/Oomycetes); grey, other protozoa (*Coccidia*, *Trichomonas*, *Giardia*).  
639 SH-like support values are represented by circles at the nodes if >0.7 and are sized  
640 according to values where the largest circles represent an SH-like support of 1. For  
641 sequences that are less than 80% of the alignment length, the sequence length in amino  
642 acids (aa) and an asterisk is included in the taxa name.

643

644 **Figure 3. Phylogenetic analysis of the RdRp of vertebrate-specific viruses found in**  
645 **rabbit caecum.** ML trees of the RdRp region of (A) the novel rabbit calicivirus –  
646 *Racaecavirus* - and (B) the novel rabbit picornavirus – *Orycavirus* - together with  
647 representative reference sequences for these virus families are shown. Taxa names of the  
648 viruses discovered in this study are bolded with a black rabbit symbol adjacent. A pink star  
649 symbol adjacent to taxa names indicates a novel virus species and the proposed virus  
650 species name is given as the taxa name (with strain name in parentheses). GenBank  
651 accession numbers are included in the taxa name and these names are colour-coded  
652 according to host as specified by coloured symbols to the right of each tree. Clade labelling  
653 indicates specific genera. SH-like approximate likelihood ratio branch support greater than  
654 0.7 is indicated by circles at the nodes which are sized according to degree of support (SH-  
655 like support of 1 has the largest size). Trees were midpoint rooted for clarity. The genome  
656 structure and length of the isolated contigs is shown below each tree, with open boxes  
657 representing ORFs, and green boxes indicating conserved protein domains: Polyprotein N-  
658 term, N-terminal region of the polyprotein; Hel, helicase; RdRp, RNA-dependent RNA  
659 polymerase; Calici coat, calicivirus capsid/coat protein; 3CPro, 3C proteinase.

660



661 **Figure 4. Phylogenetic analysis of the RdRp of novel picobirnaviruses.** ML tree of the  
662 RdRp region of novel rabbit picobirnaviruses and representative picobirnaviruses from  
663 GenBank. The novel rabbit picobirnavirus taxa names are bolded, coloured red and  
664 emphasised with a black rabbit symbol adjacent to the name. A pink star symbol adjacent  
665 to taxa names indicates a novel virus species and the proposed virus species name is given  
666 as the taxa name (with strain name in parentheses). The taxa names of GenBank sequences  
667 include accession numbers and are coloured according to the host taxa from which they were  
668 isolated (all invertebrate host taxa are coloured black). The host taxa associated with  
669 sequences in each clade are indicated with symbols to the right of the clade. The single  
670 picobirnavirus sequence isolated from a diatom colony is indicated with an arrow. SH-like  
671 approximate likelihood ratio branch support greater than 0.7 is indicated by circles at the  
672 nodes which are sized according to degree of support (SH-like support of 1 is maximum  
673 size). Trees were midpoint rooted for clarity.

674

675 **Figure 5. Overlap of RNA viral families in rabbits and ectoparasites.** The number of viral  
676 families/groups for which contigs were assembled from either rabbit caecal content libraries  
677 (red circle), fly libraries (blue circle) and flea libraries (purple circle), and the level of overlap  
678 for each host group are indicated by a Venn diagram. The viral families associated with each  
679 segment are listed with grey dotted lines connecting lists to segments of the Venn diagram.  
680 The abundance of each viral family for the three groups is indicated by the size of circles  
681 next to virus family names. Circles are colour-coded according to the rabbit, fly or flea  
682 group with which they are associated, and the circle sizes reflect the highest abundance of  
683 the relevant virus family within a single library in the rabbit, flea or fly group.

684 UC=unclassified.

685

686 **Figure 6. Vertebrate-specific virus reads detected in ectoparasite libraries.** The number  
687 of reads from vertebrate viruses (y-axis) detected in ectoparasite libraries (x-axis) is  
688 presented as a stacked bar plot. Vertebrate virus reads that were detected include rabbit  
689 astrovirus (RAstV), and RHDV-like viruses that include recombinant variants of rabbit  
690 haemorrhagic disease virus (RHDV), and related viruses rabbit haemorrhagic disease virus 2  
691 (RHDV2), and rabbit calicivirus Australia 1 (RCV-A1). In the legend, NS and capsid in  
692 parentheses indicates reads mapping to non-structural genes or capsid gene, respectively.  
693 Ectoparasite libraries are labelled as follows (location - species): GUNF, Gungahlin - flea;  
694 GudgF, Gudgenby - flea; GUNCaA, Gungahlin - *Calliphora augur*; GudgCaA, Gudgenby -  
695 *Calliphora augur*; GUNChsp, Gungahlin - *Chrysomya rufifacies/albiceps*; GUNCaV,  
696 Gungahlin - *Calliphora vicina*; GUNChV, Gungahlin - *Chrysomya varipes*; GUNSasp,  
697 Gungahlin - *Sarcophaga impatiens*; GudgUn, Gudgenby - *Musca vetustissima*.

698 **References**

699

700 Altschul, S. F., Madden, T. L., Schaffer, A. A., Zhang, J., Zhang, Z., Miller, W., & Lipman, D.  
701 J. (1997). Gapped BLAST and PSI-BLAST: A new generation of protein database search  
702 programs. *Nucleic Acids Research*, *25*, 3389-3402. doi:10.1093/nar/25.17.3389

703 Asgari, S., Hardy, J. R., Sinclair, R. G., & Cooke, B. D. (1998). Field evidence for mechanical  
704 transmission of rabbit haemorrhagic disease virus (RHDV) by flies (Diptera:Calliphoridae)  
705 among wild rabbits in Australia. *Virus Research*, *54*, 123-132.

706 Besemer, J., & Borodovsky, M. (1999). Heuristic approach to deriving models for gene  
707 finding. *Nucleic Acids Research*, *27*, 3911-3920. doi:10.1093/nar/27.19.3911

708 Bolger, A. M., Lohse, M., & Usadel, B. (2014). Trimmomatic: A flexible trimmer for Illumina  
709 sequence data. *Bioinformatics*, *30*, 2114-2120. doi:10.1093/bioinformatics/btu170

710 Boyer, S., Calvez, E., Chouin-Carneiro, T., Diallo, D., & Failloux, A. B. (2018). An overview of  
711 mosquito vectors of Zika virus. *Microbes and Infection*, *20*, 646-660.  
712 doi:10.1016/j.micinf.2018.01.006

713 Capella-Gutierrez, S., Silla-Martinez, J. M., & Gabaldon, T. (2009). TrimAl: A tool for  
714 automated alignment trimming in large-scale phylogenetic analyses. *Bioinformatics*, *25*,  
715 1972-1973. doi:10.1093/bioinformatics/btp348

716 Capucci, L., Fusi, P., Lavazza, A., Pacciarini, M. L., & Rossi, C. (1996). Detection and  
717 preliminary characterization of a new rabbit calicivirus related to rabbit hemorrhagic disease  
718 virus but nonpathogenic. *Journal of Virology*, *70*, 8614-8623.

719 Chihota, C. M., Rennie, L. F., Kitching, R. P., & Mellor, P. S. (2001). Mechanical transmission  
720 of lumpy skin disease virus by *Aedes aegypti* (Diptera: Culicidae). *Epidemiology and*  
721 *Infection*, *126*, 317-321.

722 Cooke, B. D., & Fenner, F. (2002). Rabbit haemorrhagic disease and the biological control of  
723 wild rabbits, *Oryctolagus cuniculus*, in Australia and New Zealand. *Wildlife Research*, *29*,  
724 689-706. doi:<https://doi.org/10.1071/WR02010>

725 Cummings, M. J., Tokarz, R., Bakamutumaho, B., Kayiwa, J., Byaruhanga, T., Owor, N., ...  
726 O'Donnell, M. R. (2019). Precision surveillance for viral respiratory pathogens: Virome  
727 capture sequencing for the detection and genomic characterization of severe acute  
728 respiratory infection in Uganda. *Clinical Infectious Diseases*, *68*, 1118-1125.  
729 doi:10.1093/cid/ciy656

730 Dolin, R. (1978). Norwalk agent-like particles associated with gastroenteritis in human  
731 beings. *Journal of the American Veterinary Medical Association*, *173*, 615-619.

732 Eden, J. S., Tanaka, M. M., Boni, M. F., Rawlinson, W. D., & White, P. A. (2013).  
733 Recombination within the pandemic norovirus GII.4 lineage. *Journal of Virology*, *87*, 6270-  
734 6282. doi:10.1128/jvi.03464-12

- 735 Feinstone, S. M., Kapikian, A. Z., & Purcell, R. H. (1973). Hepatitis A: Detection by immune  
736 electron microscopy of a virus-like antigen associated with acute illness. *Science*, *182*,  
737 1026-1028. doi:10.1126/science.182.4116.1026
- 738 Fenner, F., Day, M. F., & Woodroffe, G. M. (1952). The mechanism of the transmission of  
739 myxomatosis in the European rabbit (*Oryctolagus cuniculus*) by the mosquito *Aedes aegypti*.  
740 *The Australian Journal of Experimental Biology and Medical Science*, *30*, 139-152.
- 741 Forsythe, S. J., & Parker, D. S. (1985). Nitrogen metabolism by the microbial flora of the  
742 rabbit caecum. *The Journal of Applied Bacteriology*, *58*, 363-369.
- 743 Gall, A., Hoffmann, B., Teifke, J. P., Lange, B., & Schirmeier, H. (2007). Persistence of viral  
744 RNA in rabbits which overcome an experimental RHDV infection detected by a highly  
745 sensitive multiplex real-time RT-PCR. *Veterinary Microbiology*, *120*, 17-32.  
746 doi:10.1016/j.vetmic.2006.10.006
- 747 Ganesh, B., Masachessi, G., & Mladenova, Z. (2014). Animal picobirnavirus. *Virus Disease*,  
748 *25*, 223-238. doi:10.1007/s13337-014-0207-y
- 749 Grabherr, M. G., Haas, B. J., Yassour, M., Levin, J. Z., Thompson, D. A., Amit, I., ... Regev,  
750 A. (2011). Full-length transcriptome assembly from RNA-Seq data without a reference  
751 genome. *Nature Biotechnology*, *29*, 644-652. doi:10.1038/nbt.1883
- 752 Guan, T. P., Teng, J. L. L., Yeong, K. Y., You, Z. Q., Liu, H., Wong, S. S. Y., ... Woo, P. C. Y.  
753 (2018). Metagenomic analysis of Sichuan takin fecal sample viromes reveals novel  
754 enterovirus and astrovirus. *Virology*, *521*, 77-91. doi:10.1016/j.virol.2018.05.027
- 755 Guindon, S., Dufayard, J. F., Lefort, V., Anisimova, M., Hordijk, W., & Gascuel, O. (2010).  
756 New algorithms and methods to estimate maximum-likelihood phylogenies: Assessing the  
757 performance of PhyML 3.0. *Systematic Biology*, *59*, 307-321. doi:10.1093/sysbio/syq010
- 758 Hall, R. N., Huang, N., Roberts, J., & Strive, T. (2019). Carrion flies as sentinels for  
759 monitoring lagovirus activity in Australia. *Transboundary and Emerging Diseases*, *66*, 2025-  
760 2032. doi:10.1111/tbed.13250
- 761 Hall, R. N., Mahar, J. E., Haboury, S., Stevens, V., Holmes, E. C., & Strive, T. (2015).  
762 Emerging rabbit hemorrhagic disease virus 2 (RHDVb), Australia. *Emerging Infectious  
763 Diseases*, *21*, 2276-2278. doi:10.3201/eid2112.151210
- 764 Hall, R. N., Mahar, J. E., Read, A. J., Mourant, R., Piper, M., Huang, N., & Strive, T. (2018). A  
765 strain-specific multiplex RT-PCR for Australian rabbit haemorrhagic disease viruses  
766 uncovers a new recombinant virus variant in rabbits and hares. *Transboundary and  
767 Emerging Diseases*, *65*, e444-e456. doi:10.1111/tbed.12779
- 768 Harvey, E., Rose, K., Eden, J. S., Lawrence, A., Doggett, S. L., & Holmes, E. C. (2019).  
769 Identification of diverse arthropod associated viruses in native Australian fleas. *Virology*,  
770 *535*, 189-199. doi:10.1016/j.virol.2019.07.010
- 771 Harvey, E., Rose, K., Eden, J. S., Lo, N., Abeyasuriya, T., Shi, M., ... Holmes, E. C. (2019).  
772 Extensive diversity of RNA viruses in Australian ticks. *Journal of Virology*, *93*, e01358-01318.  
773 doi:10.1128/jvi.01358-18

- 774 Hopla, C. E., Durden, L. A., & Keirans, J. E. (1994). Ectoparasites and classification. *Revue*  
775 *Scientifique et Technique*, *13*, 985-1017.
- 776 Kato, K., & Standley, D. M. (2013). MAFFT multiple sequence alignment software version 7:  
777 Improvements in performance and usability. *Molecular Biology and Evolution*, *30*, 772-780.  
778 doi:10.1093/molbev/mst010
- 779 Kearse, M., Moir, R., Wilson, A., Stones-Havas, S., Cheung, M., Sturrock, S., ... Drummond,  
780 A. (2012). Geneious Basic: An integrated and extendable desktop software platform for the  
781 organization and analysis of sequence data. *Bioinformatics*, *28*, 1647-1649.  
782 doi:10.1093/bioinformatics/bts199
- 783 Knox, M. A., Gedye, K. R., & Hayman, D. T. S. (2018). The challenges of analysing highly  
784 diverse picobirnavirus sequence data. *Viruses*, *10*, E685. doi:10.3390/v10120685
- 785 Krishnamurthy, S. R., & Wang, D. (2018). Extensive conservation of prokaryotic ribosomal  
786 binding sites in known and novel picobirnaviruses. *Virology*, *516*, 108-114.  
787 doi:10.1016/j.virol.2018.01.006
- 788 Kuno, G., & Chang, G.-J. J. (2005). Biological transmission of arboviruses: Reexamination of  
789 and new insights into components, mechanisms, and unique traits as well as their  
790 evolutionary trends. *Clinical Microbiology Reviews*, *18*, 608-637.  
791 doi:10.1128/CMR.18.4.608-637.2005
- 792 L'Homme, Y., Sansregret, R., Plante-Fortier, E., Lamontagne, A. M., Ouardani, M., Lacroix,  
793 G., & Simard, C. (2009). Genomic characterization of swine caliciviruses representing a new  
794 genus of *Caliciviridae*. *Virus Genes*, *39*, 66-75. doi:10.1007/s11262-009-0360-3
- 795 Langmead, B., & Salzberg, S. L. (2012). Fast gapped-read alignment with Bowtie 2. *Nature*  
796 *Methods*, *9*, 357-359. doi:10.1038/nmeth.1923
- 797 Lau, S. K., Woo, P. C., Lai, K. K., Huang, Y., Yip, C. C., Shek, C. T., ... Yuen, K. Y. (2011).  
798 Complete genome analysis of three novel picornaviruses from diverse bat species. *Journal*  
799 *of Virology*, *85*, 8819-8828. doi:10.1128/jvi.02364-10
- 800 Lau, S. K., Woo, P. C., Yip, C. C., Choi, G. K., Wu, Y., Bai, R., ... Yuen, K. Y. (2012).  
801 Identification of a novel feline picornavirus from the domestic cat. *Journal of Virology*, *86*,  
802 395-405. doi:10.1128/jvi.06253-11
- 803 Li, B., Ruotti, V., Stewart, R. M., Thomson, J. A., & Dewey, C. N. (2010). RNA-Seq gene  
804 expression estimation with read mapping uncertainty. *Bioinformatics*, *26*, 493-500.  
805 doi:10.1093/bioinformatics/btp692
- 806 Li, W., & Godzik, A. (2006). Cd-hit: A fast program for clustering and comparing large sets of  
807 protein or nucleotide sequences. *Bioinformatics*, *22*, 1658-1659.  
808 doi:10.1093/bioinformatics/btl158
- 809 Lindquist, L., & Vapalahti, O. (2008). Tick-borne encephalitis. *Lancet*, *371*, 1861-1871.  
810 doi:10.1016/s0140-6736(08)60800-4

- 811 Ludert, J. E., Abdul-Latiff, L., Liprandi, A., & Liprandi, F. (1995). Identification of  
812 picobirnavirus, viruses with bisegmented double stranded RNA, in rabbit faeces. *Research*  
813 *in Veterinary Science*, 59, 222-225.
- 814 Luo, X. L., Lu, S., Jin, D., Yang, J., Wu, S. S., & Xu, J. (2018). *Marmota himalayana* in the  
815 Qinghai-Tibetan plateau as a special host for bi-segmented and unsegmented  
816 picobirnaviruses. *Emerging Microbes & Infections*, 7, 20. doi:10.1038/s41426-018-0020-6
- 817 Mahar, J. E., Hall, R. N., Peacock, D., Kovaliski, J., Piper, M., Mourant, R., ... Strive, T.  
818 (2018). Rabbit hemorrhagic disease virus 2 (RHDV2; Gl.2) is replacing endemic strains of  
819 RHDV in the Australian landscape within 18 months of its arrival. *Journal of Virology*, 92,  
820 e01374-01317. doi:10.1128/jvi.01374-17
- 821 Mahar, J. E., Read, A. J., Gu, X., Urakova, N., Mourant, R., Piper, M., ... Hall, R. N. (2018).  
822 Detection and circulation of a novel rabbit hemorrhagic disease virus in Australia. *Emerging*  
823 *Infectious Diseases*, 24, 22-31. doi:10.3201/eid2401.170412
- 824 Martella, V., Moschidou, P., Pinto, P., Catella, C., Desario, C., Larocca, V., ... Buonavoglia,  
825 C. (2011). Astroviruses in rabbits. *Emerging Infectious Diseases*, 17, 2287-2293.  
826 doi:10.3201/eid1712.110967
- 827 McColl, K. A., Merchant, J. C., Hardy, J., Cooke, B. D., Robinson, A., & Westbury, H. A.  
828 (2002). Evidence for insect transmission of rabbit haemorrhagic disease virus. *Epidemiology*  
829 *and Infection*, 129, 655-663. doi:10.1017/s0950268802007756
- 830 Merchant, J. C., Kerr, P. J., Simms, N. G., Hood, G. M., Pech, R. P., & Robinson, A. J.  
831 (2003). Monitoring the spread of myxoma virus in rabbit *Oryctolagus cuniculus* populations  
832 on the southern tablelands of New South Wales, Australia. III. Release, persistence and rate  
833 of spread of an identifiable strain of myxoma virus. *Epidemiology and Infection*, 130, 135-  
834 147. doi:10.1017/s0950268802007847
- 835 Neimanis, A., Larsson Pettersson, U., Huang, N., Gavier-Widen, D., & Strive, T. (2018).  
836 Elucidation of the pathology and tissue distribution of *Lagovirus europaeus* Gl.2/RHDV2  
837 (rabbit haemorrhagic disease virus 2) in young and adult rabbits (*Oryctolagus cuniculus*).  
838 *Veterinary Research*, 49, 46. doi:10.1186/s13567-018-0540-z
- 839 Nguyen, L. T., Schmidt, H. A., von Haeseler, A., & Minh, B. Q. (2015). IQ-TREE: A fast and  
840 effective stochastic algorithm for estimating maximum-likelihood phylogenies. *Molecular*  
841 *Biology and Evolution*, 32, 268-274. doi:10.1093/molbev/msu300
- 842 Norris, K. R. (1965). The bionomics of blow flies. *Annual Review of Entomology*, 10, 47-68.  
843 doi:10.1146/annurev.en.10.010165.000403
- 844 Ogden, N. H. (2017). Climate change and vector-borne diseases of public health  
845 significance. *FEMS Microbiology Letters*, 364. doi:10.1093/femsle/fnx186
- 846 Ohlinger, V. F., Haas, B., Meyers, G., Weiland, F., & Thiel, H. J. (1990). Identification and  
847 characterization of the virus causing rabbit hemorrhagic disease. *Journal of Virology*, 64,  
848 3331-3336.
- 849 Ohlinger, V. F., & Thiel, H. J. (1991). Identification of the viral haemorrhagic disease virus of  
850 rabbits as a calicivirus. *Revue Scientifique et Technique*, 10, 311-323.



- 851 Quast, C., Pruesse, E., Yilmaz, P., Gerken, J., Schweer, T., Yarza, P., ... Glockner, F. O.  
852 (2013). The SILVA ribosomal RNA gene database project: Improved data processing and  
853 web-based tools. *Nucleic Acids Research*, *41*, D590-596. doi:10.1093/nar/gks1219
- 854 Rodhain, F. (2015). Insects as vectors: Systematics and biology. *Revue Scientifique et  
855 Technique*, *34*, 83-96, 67-82.
- 856 Rosenberg, R., & Beard, C. B. (2011). Vector-borne infections. *Emerging Infectious  
857 Diseases*, *17*, 769-770. doi:10.3201/eid1705.110310
- 858 Schwensow, N. I., Cooke, B., Kovaliski, J., Sinclair, R., Peacock, D., Fickel, J., & Sommer,  
859 S. (2014). Rabbit haemorrhagic disease: Virus persistence and adaptation in Australia.  
860 *Evolutionary Applications*, *7*, 1056-1067. doi:10.1111/eva.12195
- 861 Shi, M., Lin, X. D., Chen, X., Tian, J. H., Chen, L. J., Li, K., ... Zhang, Y. Z. (2018). The  
862 evolutionary history of vertebrate RNA viruses. *Nature*, *556*, 197-202. doi:10.1038/s41586-  
863 018-0012-7
- 864 Shi, M., Lin, X. D., Tian, J. H., Chen, L. J., Chen, X., Li, C. X., ... Zhang, Y. Z. (2016).  
865 Redefining the invertebrate RNA virosphere. *Nature*, *540*, 539-543. doi:10.1038/nature20167
- 866 Shi, M., Neville, P., Nicholson, J., Eden, J. S., Imrie, A., & Holmes, E. C. (2017). High-  
867 resolution metatranscriptomics reveals the ecological dynamics of mosquito-associated  
868 RNA viruses in Western Australia. *Journal of Virology*, *91*, e00680-00617.  
869 doi:10.1128/jvi.00680-17
- 870 Shi, M., Zhang, Y. Z., & Holmes, E. C. (2018). Meta-transcriptomics and the evolutionary  
871 biology of RNA viruses. *Virus Research*, *243*, 83-90. doi:10.1016/j.virusres.2017.10.016
- 872 Smits, S. L., Poon, L. L., van Leeuwen, M., Lau, P. N., Perera, H. K., Peiris, J. S., ...  
873 Osterhaus, A. D. (2011). Genogroup I and II picobirnaviruses in respiratory tracts of pigs.  
874 *Emerging Infectious Diseases*, *17*, 2328-2330. doi:10.3201/eid1712.110934
- 875 Smits, S. L., van Leeuwen, M., Schapendonk, C. M., Schurch, A. C., Bodewes, R.,  
876 Haagmans, B. L., & Osterhaus, A. D. (2012). Picobirnaviruses in the human respiratory tract.  
877 *Emerging Infectious Diseases*, *18*, 1539-1540. doi:10.3201/eid1809.120507
- 878 Sobey, W. R., & Conolly, D. (1971). Myxomatosis: The introduction of the European rabbit  
879 flea *Spilopsyllus cuniculi* (Dale) into wild rabbit populations in Australia. *The Journal of  
880 Hygiene*, *69*, 331-346.
- 881 Strive, T., Wright, J. D., & Robinson, A. J. (2009). Identification and partial characterisation  
882 of a new lagovirus in Australian wild rabbits. *Virology*, *384*, 97-105.  
883 doi:10.1016/j.virol.2008.11.004
- 884 Thornhill, T. S., Kalica, A. R., Wyatt, R. G., Kapikian, A. Z., & Chanock, R. M. (1975). Pattern  
885 of shedding of the Norwalk particle in stools during experimentally induced gastroenteritis in  
886 volunteers as determined by immune electron microscopy. *The Journal of Infectious  
887 Diseases*, *132*, 28-34. doi:10.1093/infdis/132.1.28
- 888 Tseng, C. H., & Tsai, H. J. (2007). Sequence analysis of a duck picornavirus isolate indicates  
889 that it together with porcine enterovirus type 8 and simian picornavirus type 2 should be

- 890 assigned to a new picornavirus genus. *Virus Research*, 129, 104-114.  
891 doi:10.1016/j.virusres.2007.06.023
- 892 Urayama, S., Takaki, Y., & Nunoura, T. (2016). FLDS: A comprehensive dsRNA sequencing  
893 method for intracellular RNA virus surveillance. *Microbes and Environments*, 31, 33-40.  
894 doi:10.1264/jsme2.ME15171
- 895 Velasco-Galilea, M., Piles, M., Vinas, M., Rafel, O., Gonzalez-Rodriguez, O., Guivernau, M.,  
896 & Sanchez, J. P. (2018). Rabbit microbiota changes throughout the intestinal tract. *Frontiers*  
897 *in Microbiology*, 9, 2144. doi:10.3389/fmicb.2018.02144
- 898 Wells, A. I., & Coyne, C. B. (2019). Enteroviruses: A gut-wrenching game of entry, detection,  
899 and evasion. *Viruses*, 11, E460. doi:10.3390/v11050460
- 900 Woo, P. C., Lau, S. K., Teng, J. L., Tsang, A. K., Joseph, M., Wong, E. Y., ... Yuen, K. Y.  
901 (2014). Metagenomic analysis of viromes of dromedary camel fecal samples reveals large  
902 number and high diversity of circoviruses and picobirnaviruses. *Virology*, 471-473, 117-125.  
903 doi:10.1016/j.virol.2014.09.020
- 904 Woo, P. C., Teng, J. L., Bai, R., Wong, A. Y., Martelli, P., Hui, S. W., ... Yuen, K. Y. (2016).  
905 High diversity of genogroup I picobirnaviruses in mammals. *Frontiers in Microbiology*, 7,  
906 1886. doi:10.3389/fmicb.2016.01886
- 907 Woo, P. C., Teng, J. L. L., Bai, R., Tang, Y., Wong, A. Y. P., Li, K. S. M., ... Yuen, K. Y.  
908 (2019). Novel picobirnaviruses in respiratory and alimentary tracts of cattle and monkeys  
909 with large intra- and inter-host diversity. *Viruses*, 11, E574. doi:10.3390/v11060574
- 910 Zell, R. (2018). *Picornaviridae* - the ever-growing virus family. *Archives of Virology*, 163, 299-  
911 317. doi:10.1007/s00705-017-3614-8
- 912 Zhang, W., Yang, S., Shan, T., Hou, R., Liu, Z., Li, W., ... Delwart, E. (2017). Virome  
913 comparisons in wild-diseased and healthy captive giant pandas. *Microbiome*, 5, 90.  
914 doi:10.1186/s40168-017-0308-0
- 915



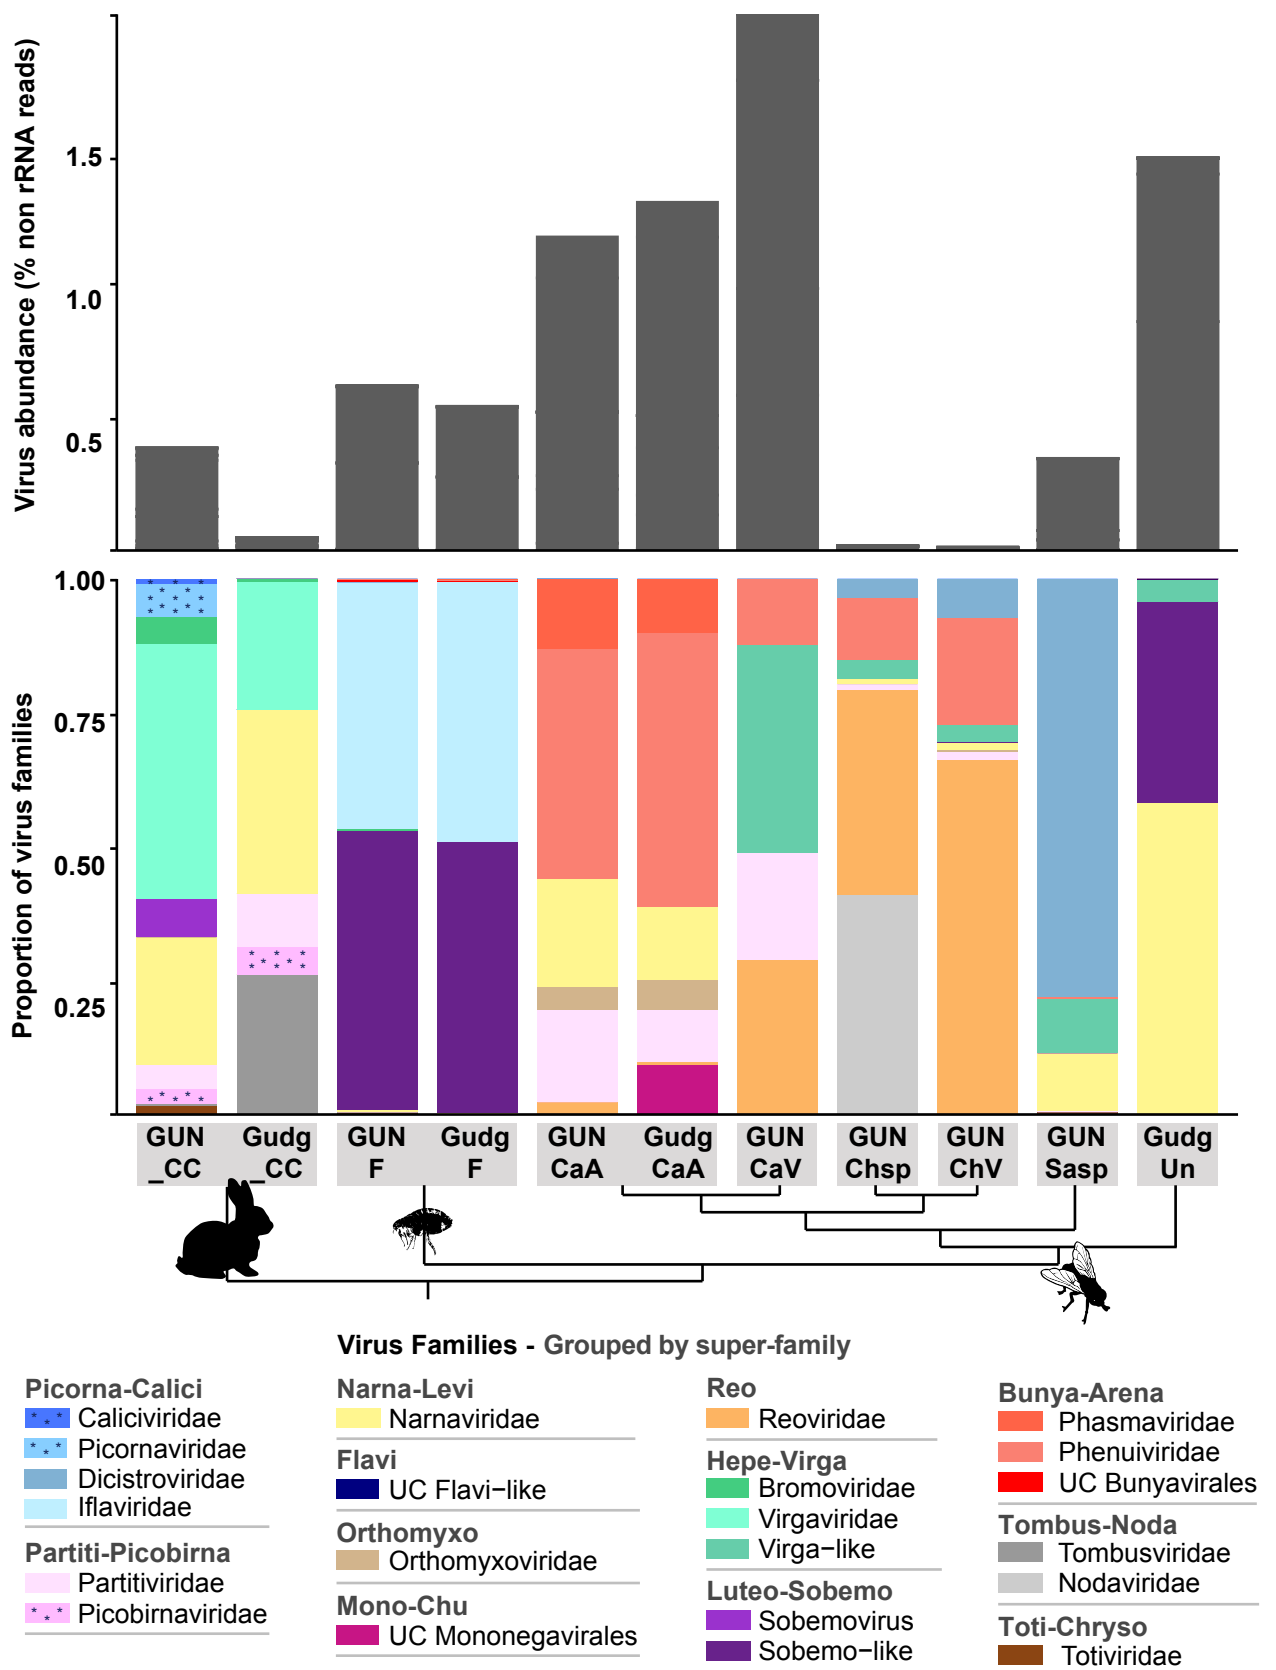

**Figure 1**



# Positive-sense ssRNA viruses continued

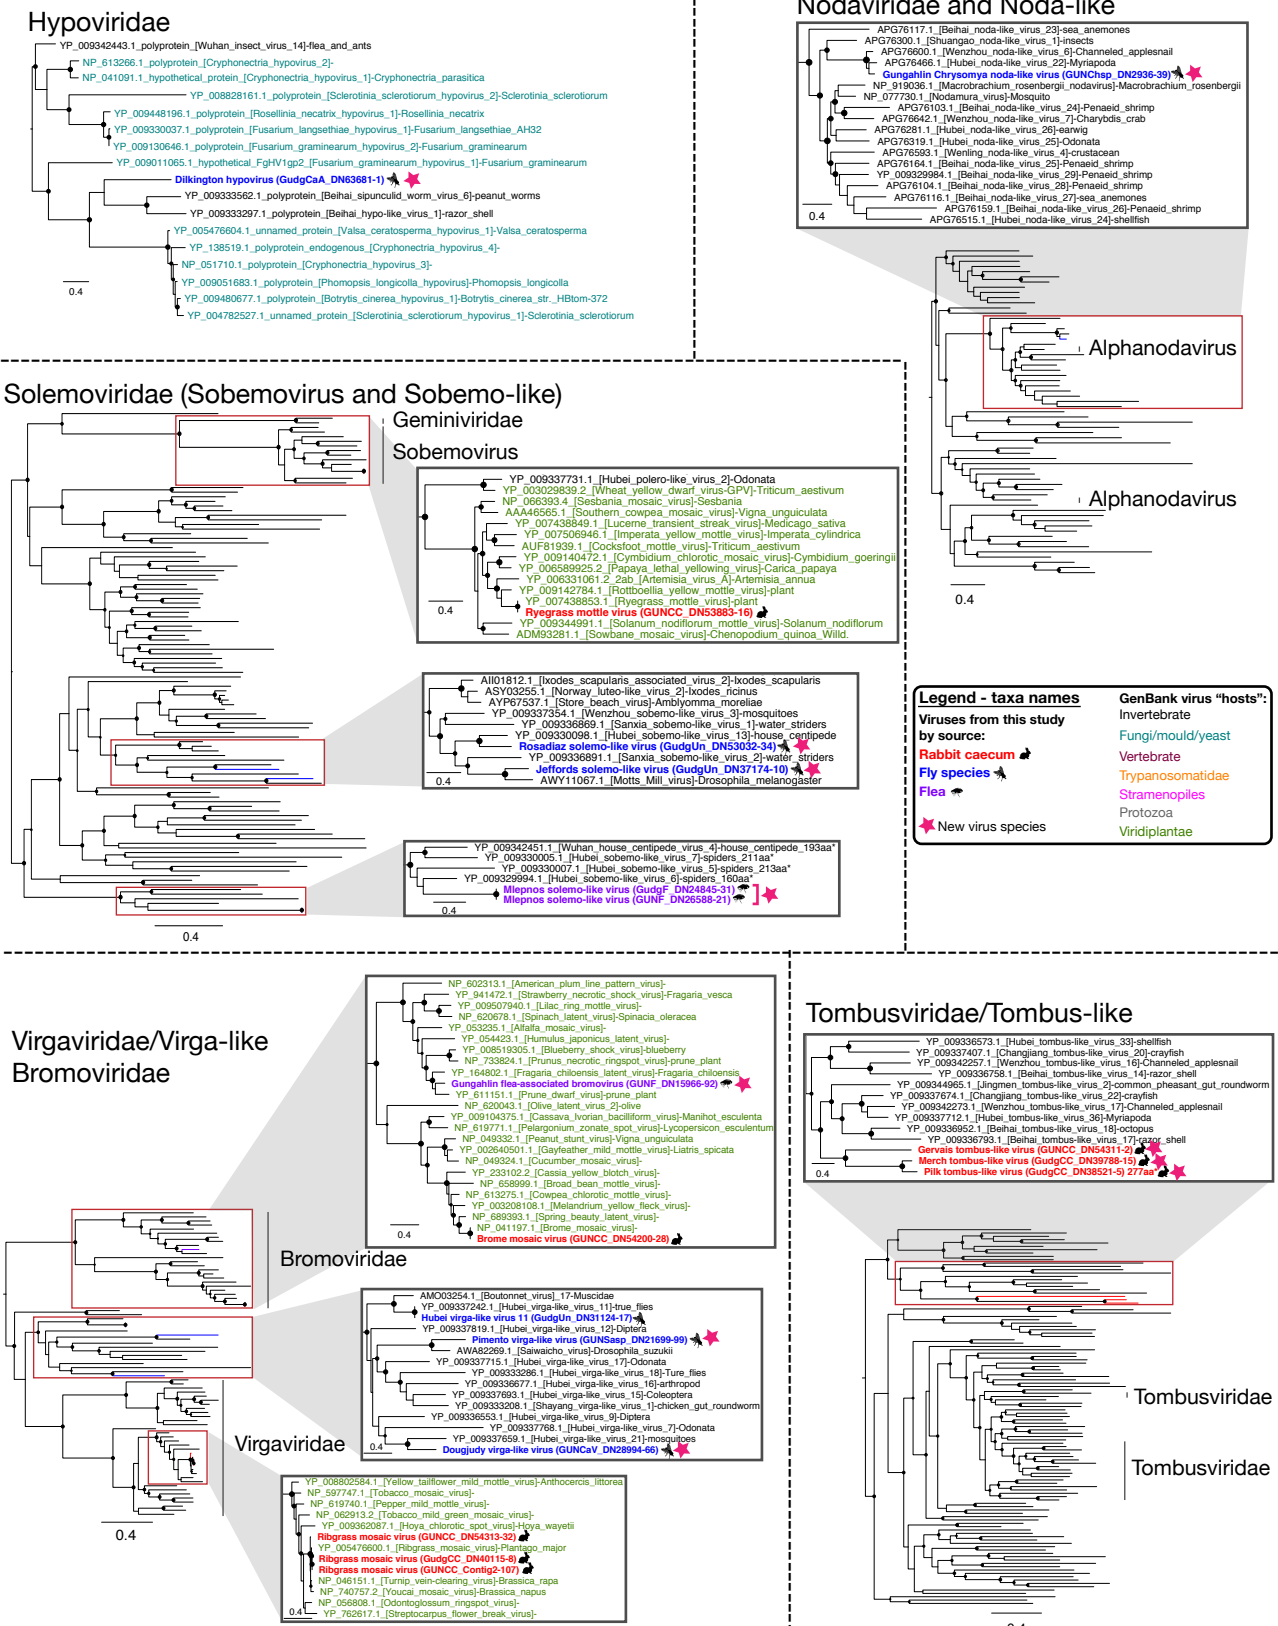

Figure 2 continued

# Negative-sense (or ambisense) ssRNA viruses

## Mono-Chu superfamily

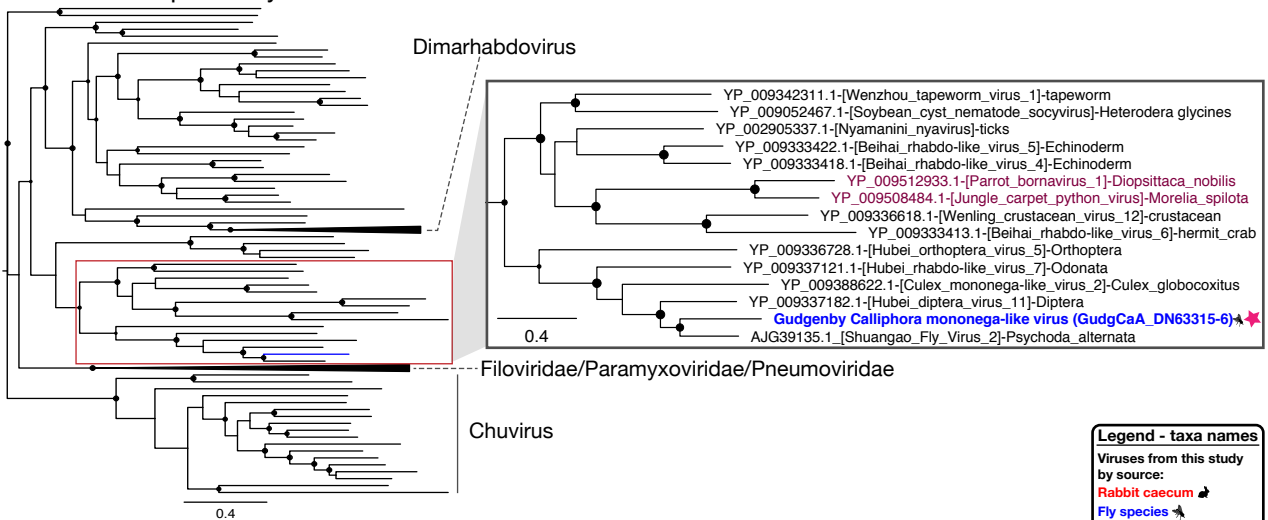

### Legend - taxa names

Viruses from this study by source:

Rabbit caecum 🐰

Fly species 🪰

Flea 🐕

★ New virus species

GenBank virus "hosts":

Invertebrate

Fungi/mould/yeast

Vertebrate

Trypanosomatidae

Stramenopiles

Protozoa

Viridiplantae

## Orthomyxoviridae

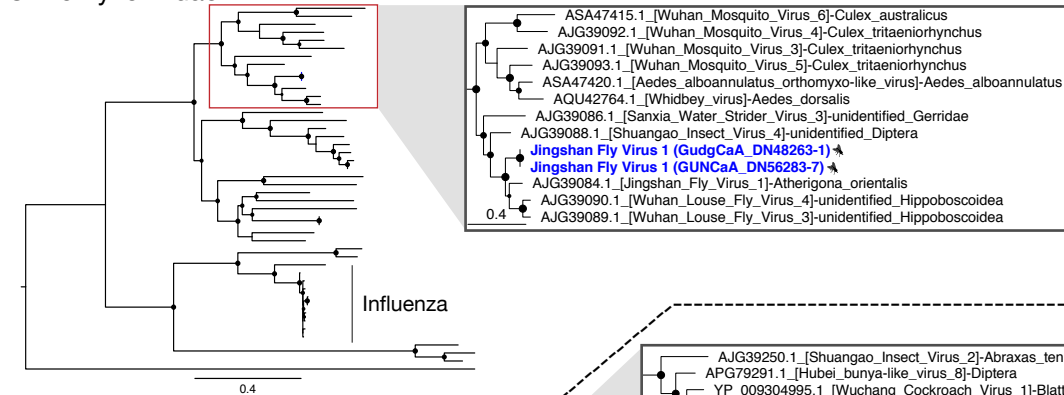

## Bunyavirales

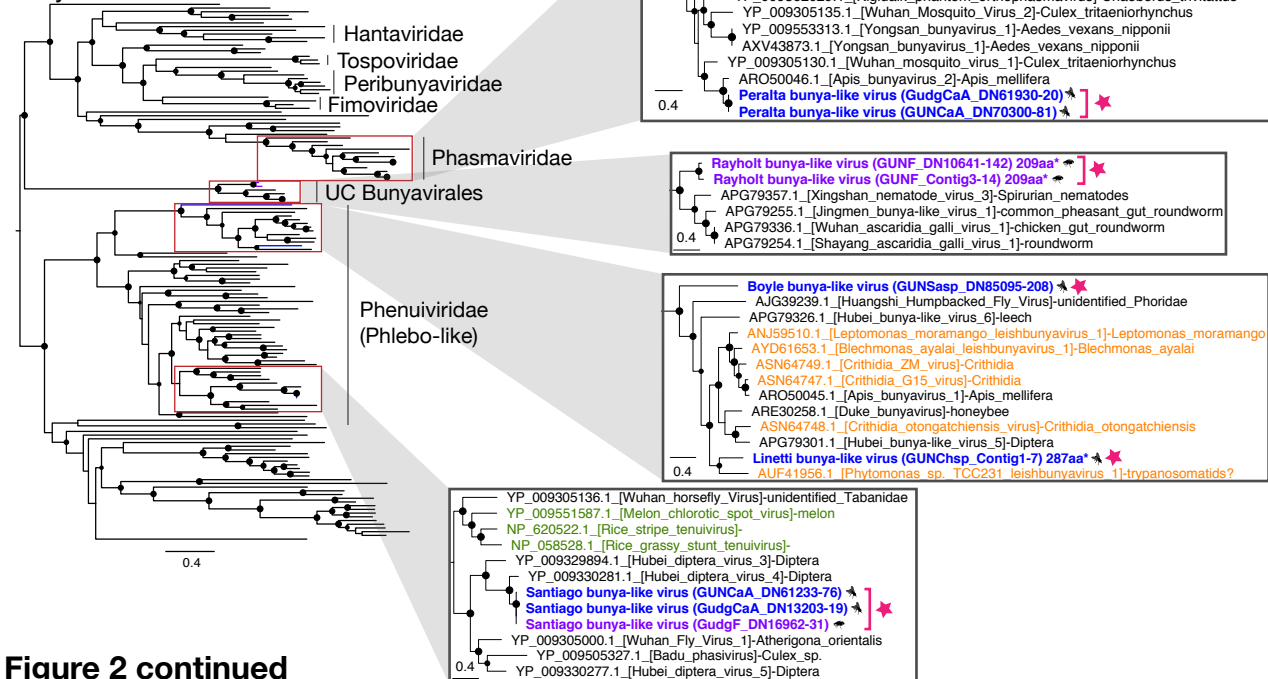

Figure 2 continued

# dsRNA viruses

## Toti-Chryso superfamily

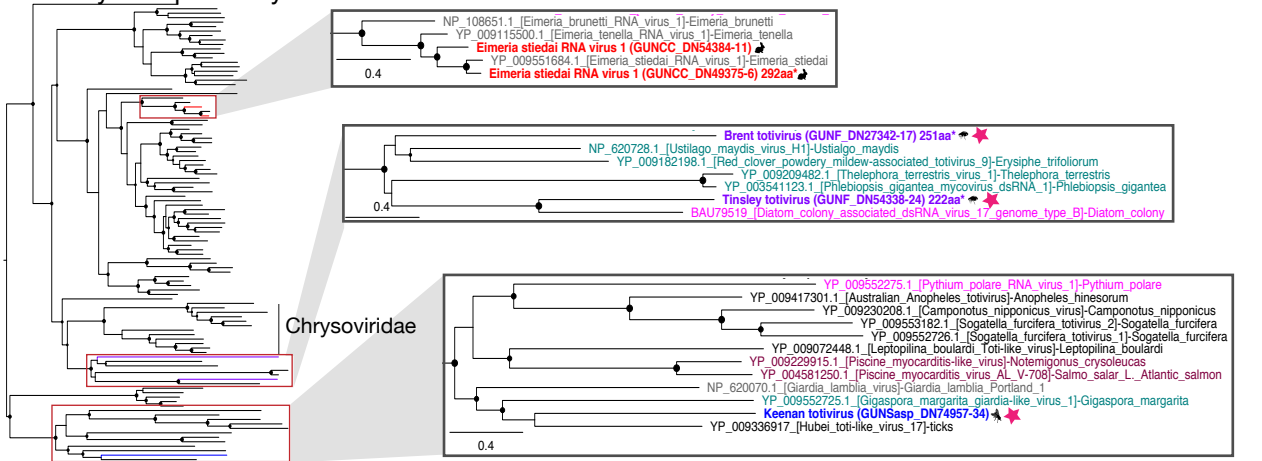

## Reoviridae

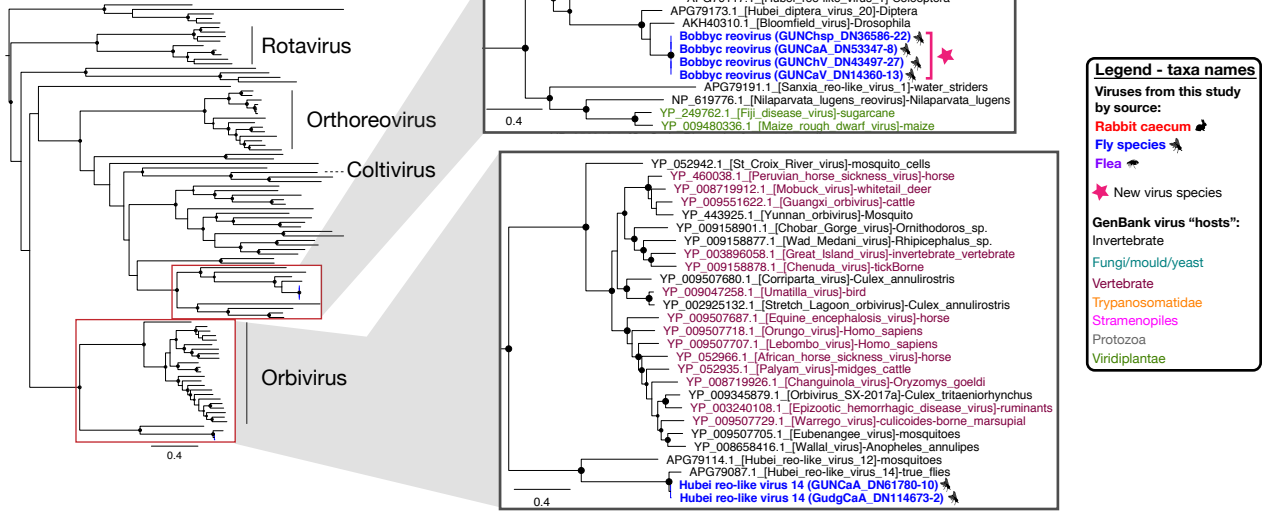

**Legend - taxa names**

Viruses from this study by source:

- Rabbit caecum
- Fly species
- Flea

★ New virus species

GenBank virus "hosts":

- Invertebrate
- Fungi/mould/yeast
- Vertebrate
- Trypanosomatidae
- Stramenopiles
- Protozoa
- Viridiplantae

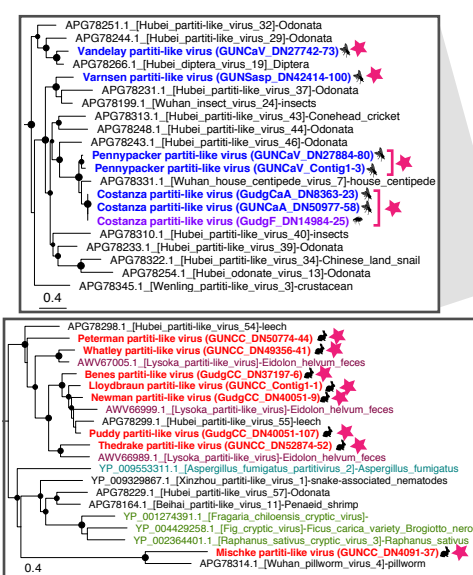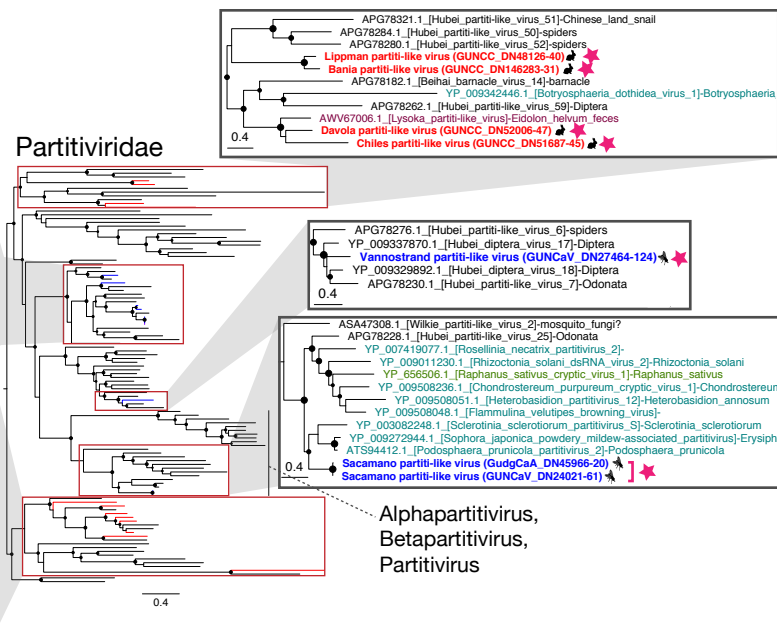

Figure 2 continued



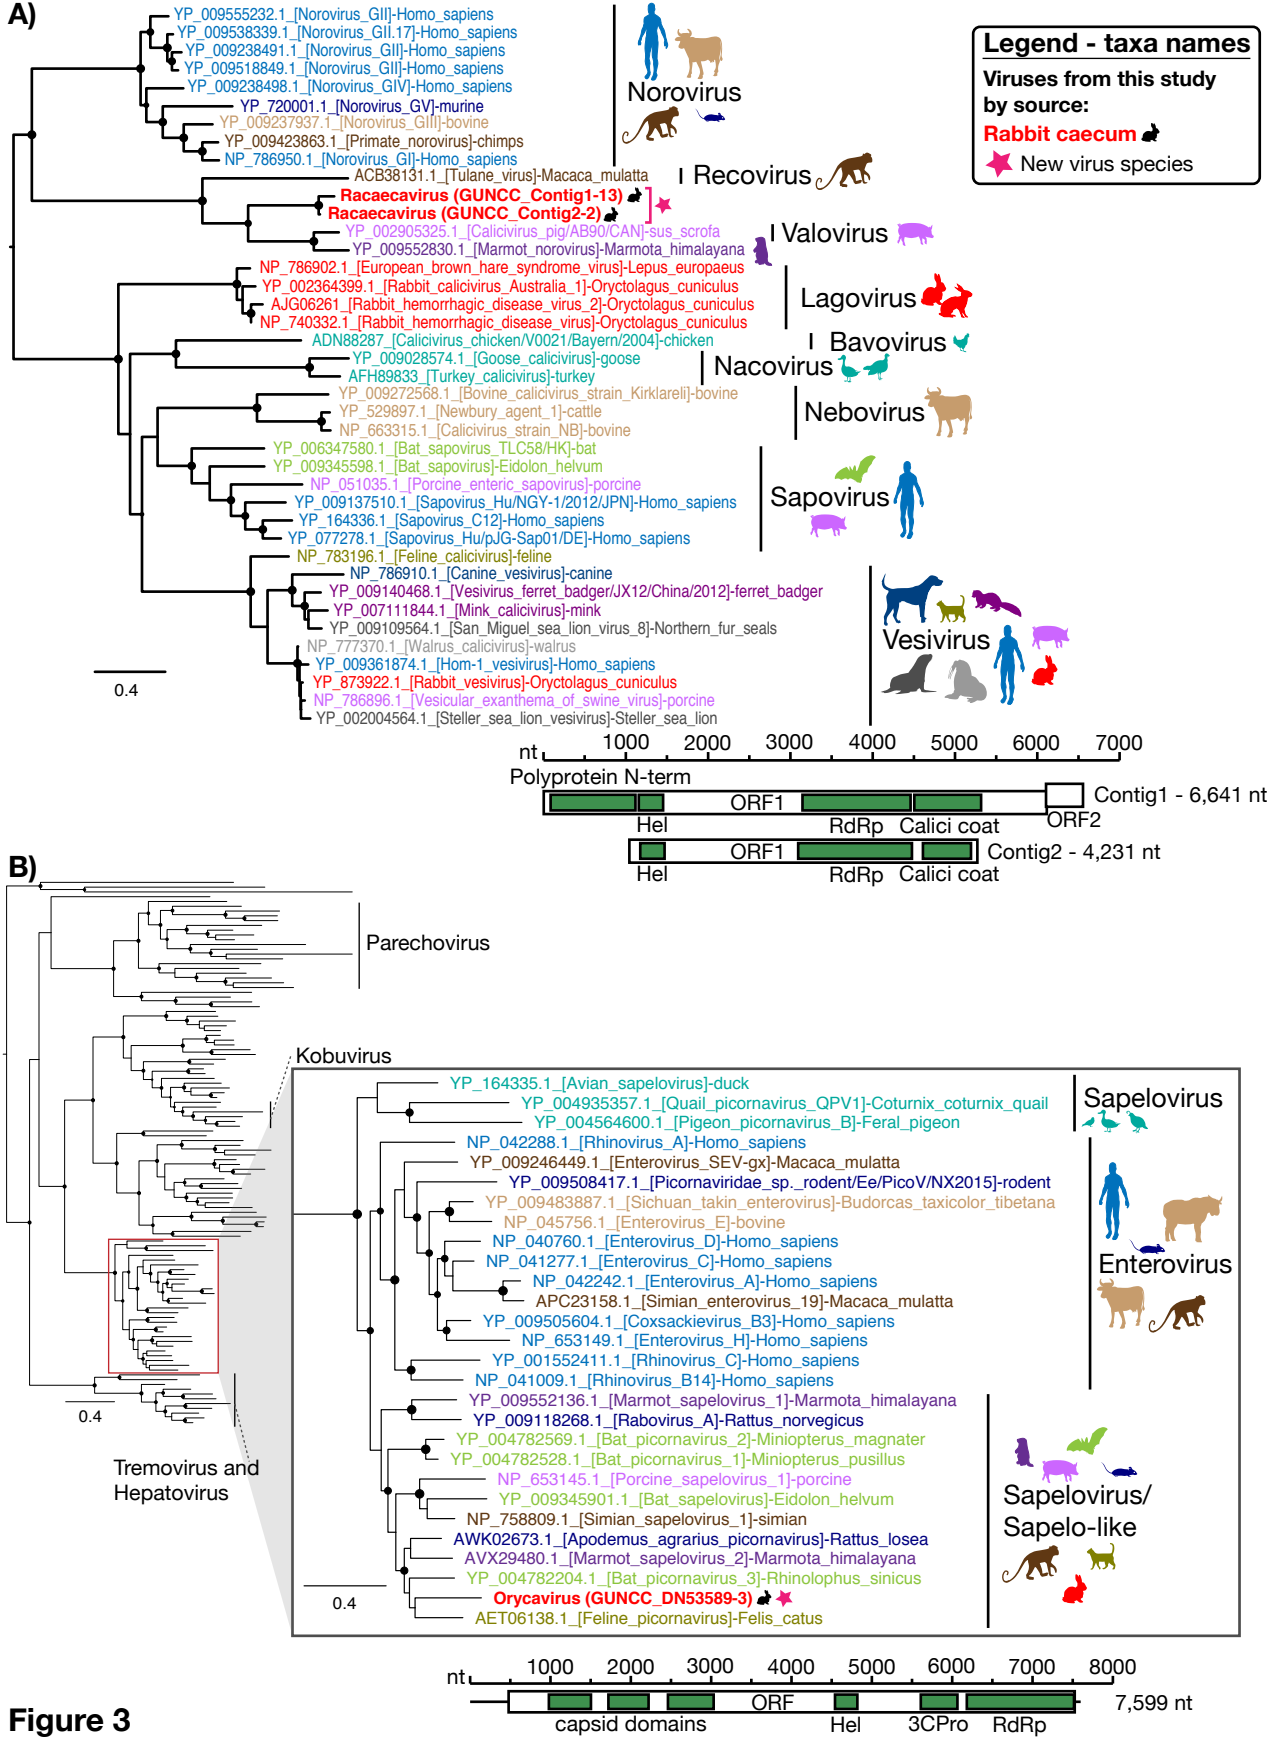

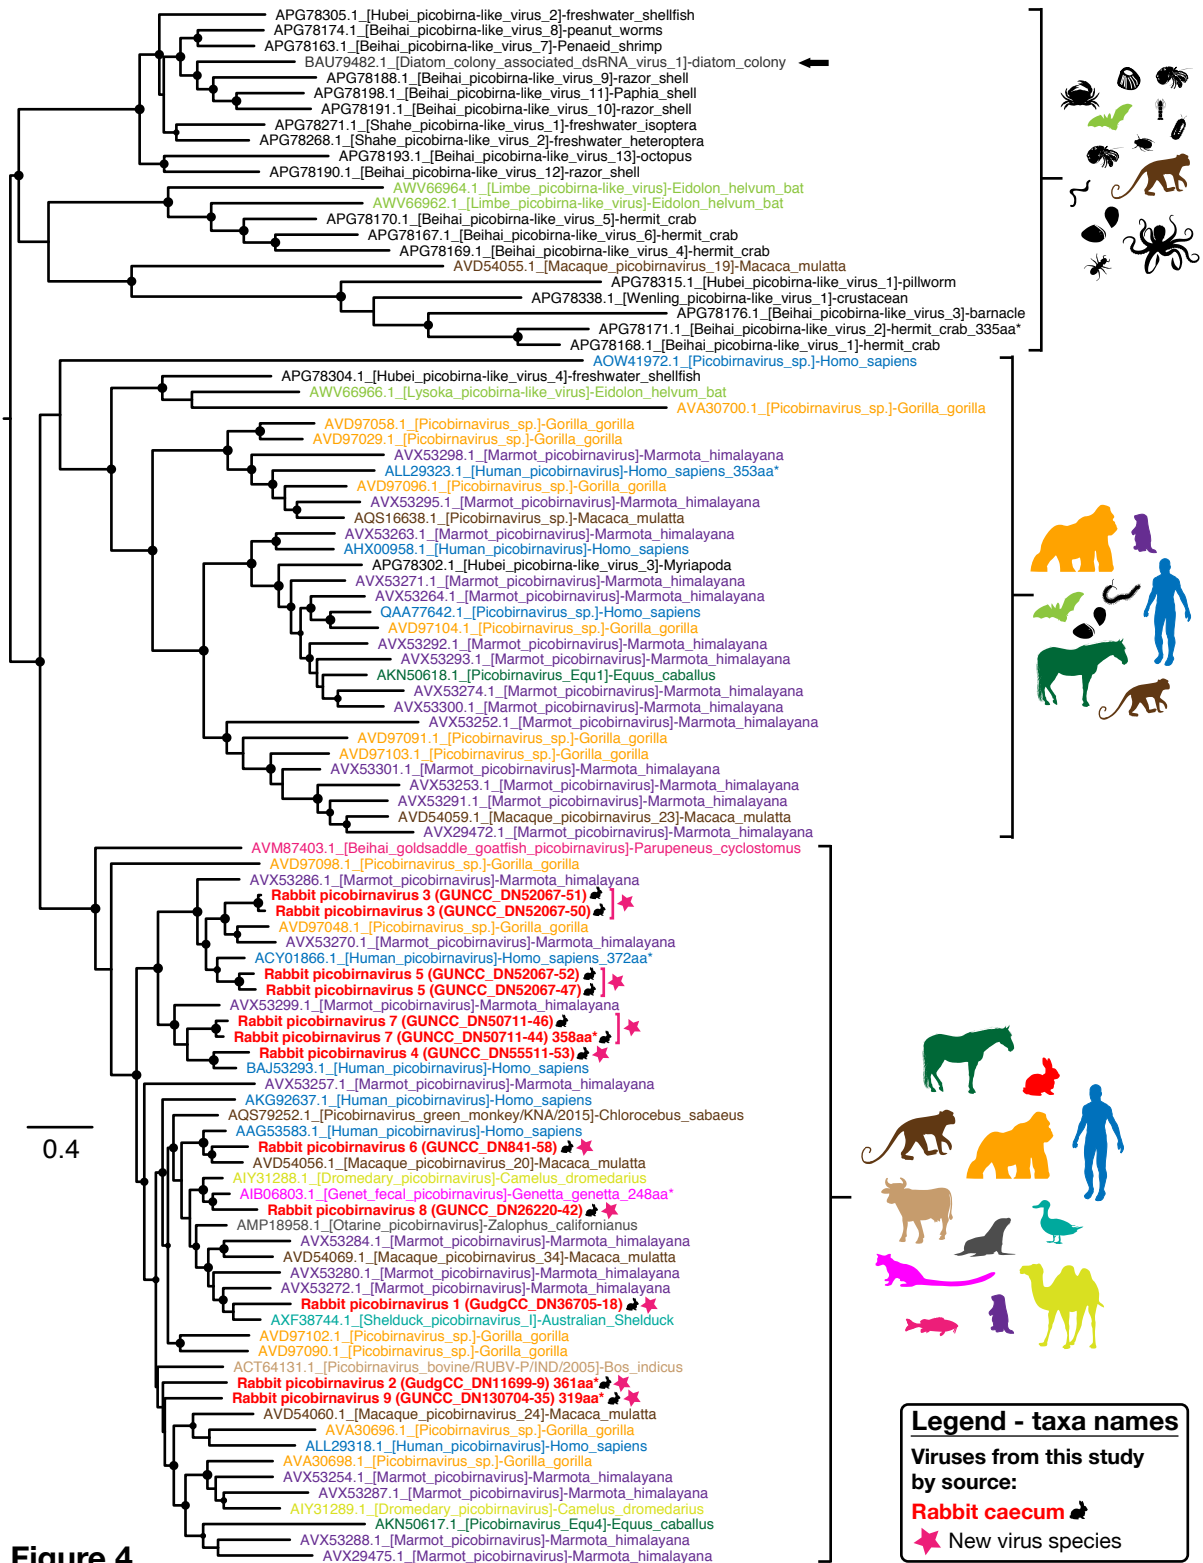

Figure 4

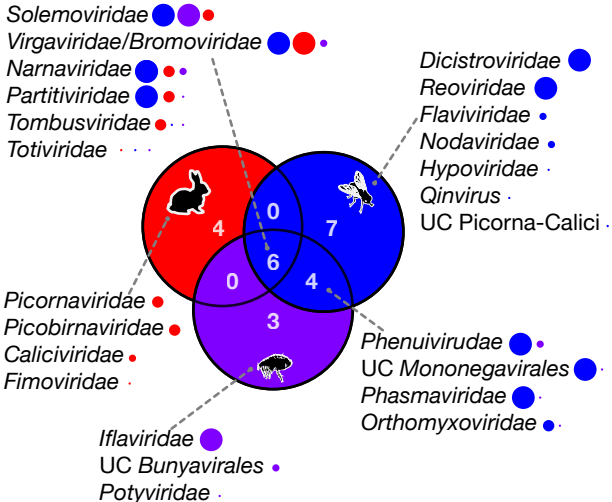

**Figure 5**



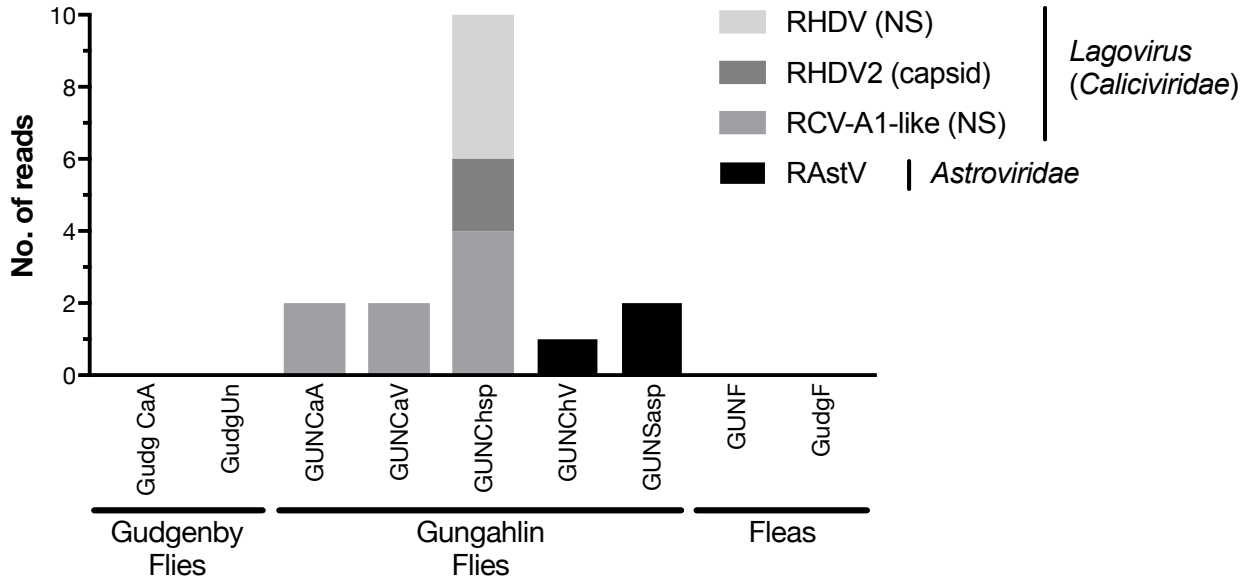

**Figure 6**
